# Supplementary material for: Truncated SALL1 Impedes Primary Cilia Function in Townes-Brocks Syndrome
Source: PubMed Central journal article supplement — Am J Hum Genet. 2018 Feb 1;102(2):249–65. doi: 10.1016/j.ajhg.2017.12.017 (PMC5985538; doi:10.1016/j.ajhg.2017.12.017), 2018-02-01
Supplement: mmc3.pdf [file mmc3.pdf]

# Truncated SALL1 Impedes Primary Cilia Function in Townes-Brocks Syndrome

Laura Bozal-Basterra,<sup>1</sup> Itziar Martín-Ruíz,<sup>1</sup> Lucia Pirone,<sup>1</sup> Yinwen Liang,<sup>2</sup> Jón Otti Sigurðsson,<sup>3</sup> Maria Gonzalez-Santamarta,<sup>1</sup> Immacolata Giordano,<sup>1</sup> Estibaliz Gabicagogeascoa,<sup>1</sup> Angela de Luca,<sup>1</sup> Jose A. Rodríguez,<sup>4</sup> Andrew O.M. Wilkie,<sup>5</sup> Jürgen Kohlhase,<sup>6</sup> Deborah Eastwood,<sup>7</sup> Christopher Yale,<sup>8</sup> Jesper V. Olsen,<sup>3</sup> Michael Rauchman,<sup>9,10,11</sup> Kathryn V. Anderson,<sup>2</sup> James D. Sutherland,<sup>1,\*</sup> and Rosa Barrio<sup>1,\*</sup>

Townes-Brocks syndrome (TBS) is characterized by a spectrum of malformations in the digits, ears, and kidneys. These anomalies overlap those seen in a growing number of ciliopathies, which are genetic syndromes linked to defects in the formation or function of the primary cilia. TBS is caused by mutations in the gene encoding the transcriptional repressor SALL1 and is associated with the presence of a truncated protein that localizes to the cytoplasm. Here, we provide evidence that SALL1 mutations might cause TBS by means beyond its transcriptional capacity. By using proximity proteomics, we show that truncated SALL1 interacts with factors related to cilia function, including the negative regulators of ciliogenesis CCP110 and CEP97. This most likely contributes to more frequent cilia formation in TBS-derived fibroblasts, as well as in a CRISPR/Cas9-generated model cell line and in TBS-modeled mouse embryonic fibroblasts, than in wild-type controls. Furthermore, TBS-like cells show changes in cilia length and disassembly rates in combination with aberrant SHH signaling transduction. These findings support the hypothesis that aberrations in primary cilia and SHH signaling are contributing factors in TBS phenotypes, representing a paradigm shift in understanding TBS etiology. These results open possibilities for the treatment of TBS.

## Introduction

Townes-Brocks syndrome (TBS1 [MIM: 107480]) is characterized by the presence of an imperforate anus and dysplastic ears and is frequently associated with sensorineural and/or conductive hearing impairment and thumb malformations such as triphalangy, duplications (preaxial polydactyly), and hypoplasia.<sup>1</sup> Common features among TBS individuals include end-stage renal disease, polycystic kidneys, foot and genitourinary malformations, and congenital heart disease. Although less common, short ribs, intellectual disability, growth retardation, cleft palate, and eye defects are also observed. TBS is an autosomal-dominant genetic disease caused by mutations in SALL1 (SAL-like 1 [MIM: 602218]),<sup>2,3</sup> one of the four members of the SALL gene family in vertebrates. SALL1 encodes a zinc-finger transcription factor linked to chromatin-mediated repression.<sup>4</sup> SALL1 is characterized by the presence of stereotypical pairs of zinc-finger domains along the protein, which are thought to mediate interactions with DNA via an AT-rich sequence.<sup>5</sup> In vertebrates, the N-terminal region of SALL1 mediates transcriptional repression via its interaction with the nucleosome-remodeling deacetylase (NuRD) complex<sup>6</sup> as well as containing a polyglutamine

domain involved in dimerization with itself or other SALL family members.<sup>7</sup>

Dominant genetic syndromes are often caused by a gain-of-function or dominant-negative effect of the underlying mutant proteins. Many TBS-causing SALL1 mutations could result in truncated proteins that lack most of the zinc finger pairs likely to mediate chromatin-DNA interactions but retain the N-terminal domain. In fact, this region represents a mutational “hotspot” where many nonsense mutations and deletions causing frameshifts have been described.<sup>3</sup> Mutant SALL1 mRNA transcripts are stable and resistant to nonsense-mediated decay,<sup>8</sup> and the resulting truncated proteins are able to interact with the NuRD complex and perhaps other factors, as well as form dimers with themselves, with full-length SALL1 (SALL1<sup>FL</sup>), or with other SALL proteins.<sup>9</sup> Sall1<sup>+/-</sup> and Sall1<sup>-/-</sup> mice fail to show TBS-like phenotypes,<sup>10-12</sup> discarding haploinsufficiency as the most plausible cause of the disease. Only when murine Sall1 is altered to mimic human mutations (i.e., to generate a truncated protein in a single copy) do mice display TBS symptoms, such as hearing loss and anus and limb malformations.<sup>11</sup> Because TBS depends on the presence of a truncated SALL1, elucidating its role and its possible interference with SALL1<sup>FL</sup> and other factors would fill a major gap in our understanding of TBS.

<sup>1</sup>CIC bioGUNE, Bizkaia Technology Park, Building 801-A, 48160 Derio, Bizkaia, Spain; <sup>2</sup>Memorial Sloan Kettering Cancer Center, 1275 York Avenue, New York, NY 10065, USA; <sup>3</sup>Novo Nordisk Foundation Center for Protein Research, Faculty of Health and Medical Sciences, University of Copenhagen, Blegdamsvej 3b, 2200 Copenhagen, Denmark; <sup>4</sup>Department of Genetics, Physical Anthropology, and Animal Physiology, University of the Basque Country (UPV/EHU), Leioa, Spain; <sup>5</sup>Weatherall Institute of Molecular Medicine, University of Oxford, Oxford, UK; <sup>6</sup>SYNLAB Center for Human Genetics Freiburg, Heinrich-von-Stephan-Straße 5, 79100 Freiburg, Germany; <sup>7</sup>Great Ormond Street Hospital, Great Ormond Street, London WC1N 3JH, UK; <sup>8</sup>Ipswich Hospital NHS Trust, Heath Road, Ipswich IP4 5PD, Suffolk, UK; <sup>9</sup>Saint Louis University School of Medicine, 1100 South Grand Boulevard, St. Louis, MO 63104, USA; <sup>10</sup>VA St. Louis Health Care System, St. Louis, MO 63106, USA; <sup>11</sup>Present address: Washington University, Division of Nephrology, 660 South Euclid Avenue, Box 8126, St. Louis, MO 63110, USA

\*Correspondence: jsutherland@cicbiogune.es (J.D.S.), rbarrio@cicbiogune.es (R.B.)

<https://doi.org/10.1016/j.ajhg.2017.12.017>

© 2017 The Author(s). This is an open access article under the CC BY-NC-ND license (<http://creativecommons.org/licenses/by-nc-nd/4.0/>).

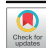

Intriguingly, some TBS features match those seen in ciliopathies, diseases linked to the function of primary cilia.<sup>13</sup> Ciliopathies present a spectrum of overlapping phenotypes such as polycystic kidneys, hearing loss, limb defects, and mental retardation, among others. These coincidental features could suggest similar cellular and molecular underpinnings between ciliopathies and TBS.

Cilia are microtubule-based organelles that emerge from centriole-containing basal bodies. Centrioles, together with their surrounding matrix, the pericentriolar material, form the centrosome. Once anchored to the plasma membrane, centrioles behave as basal bodies, giving rise to two different kinds of cilia: motile cilia (or flagella) and primary cilia. Non-motile primary cilia are present in most vertebrate cells,<sup>14</sup> and ciliary assembly and disassembly are coordinated during the cell cycle.<sup>15,16</sup> Primary cilia arise from the mother centriole (MC) upon entry into the G0 phase, reabsorb as cells progress from the G1 to the S phase, and completely disassemble in mitosis.<sup>17</sup> Cilia assembly is tightly controlled by essential proteins that contribute to structure and transport to, from, or within the cilia and counterbalanced with negative regulators. Primary cilia have a crucial role in cell signaling, polarity, and protein trafficking. During development, the vertebrate Sonic Hedgehog (SHH) pathway is crucial for vertebrate digit patterning and is fully dependent on primary cilia.<sup>18,19</sup> In brief, SHH activation through its receptor PTCH1 leads to ciliary enrichment of the transmembrane protein Smoothened (SMO) and a concomitant conversion of the transcription factor GLI3 from a repressor to an activator, leading to activation of SHH target genes, such as *GLI1* (GLI family zinc finger 1 [MIM: 165220]) and *PTCH1* (patched 1 [MIM: 601309]). The trafficking through primary cilia is tightly regulated by several anterograde and retrograde systems.<sup>20,21</sup> Mutations in genes that encode intraflagellar transport proteins deregulate SHH signaling and result in limb and neural-tube-closure defects, phenotypes similar to those resulting from mutations of genes encoding SHH pathway components.<sup>22–24</sup>

Here, we show that TBS-derived primary fibroblasts exhibit changes in SALL1<sup>FL</sup> localization, a higher rate of ciliogenesis, abnormally elongated cilia, aberrant cilia disassembly, and SHH signaling defects. Through proximity proteomics, we identified two main ciliogenesis suppressors, CCP110 (centriolar coiled-coil protein of 110 kDa) and CEP97 (centrosomal protein of 97 kDa), as interactors of TBS-causing truncated SALL1. The higher rate of ciliogenesis detected in TBS-derived fibroblasts is consistent with an observed lower amount of CCP110 and CEP97 at the MC in these fibroblasts than in controls.

Furthermore, truncated SALL1, alone or in complex with SALL1<sup>FL</sup>, interacts with CCP110 and CEP97 in the cytoplasm of individual-derived fibroblasts, which most likely leads to a reduction of CCP110 and CEP97 at the MC by sequestration. These results indicate that truncated proteins arising from certain *SALL1* mutations can disrupt cilia

formation and function. Therefore, TBS might be considered a ciliopathy-like disease.

## Material and Methods

### Cell Culture

TBS-derived primary fibroblasts, mouse embryonic fibroblasts (MEFs), HEK293FT cells (Invitrogen), U2OS cells (ATCC HTB-96), and mouse *Shh-LIGHT2* cells<sup>25</sup> were cultured at 37°C and 5% CO<sub>2</sub> in Dulbecco's modified Eagle's medium (DMEM) supplemented with 10% fetal bovine serum (FBS; GIBCO) and 1% penicillin and streptomycin (GIBCO). Human TERT-RPE1 cells (ATCC CRL-4000) were cultured in DMEM/F12 (GIBCO) supplemented with 10% FBS and 1% penicillin and streptomycin. Dermal fibroblasts carrying a *SALL1* c.995delC mutation, which produces a truncated p.Pro332Hisfs\*10 protein, were derived from male TBS individual OX3335 (TBS<sup>P.Pro332Hisfs\*10</sup> herein).<sup>3,8</sup> Dermal fibroblasts carrying the *SALL1* pathogenic variant c.826C>T, which produces a truncated p.Arg276\* protein, were derived from male TBS individual UKTBS#3 (TBS<sup>P.Arg276\*</sup> herein). Human neonatal foreskin fibroblasts (HFFs; ATCC CRL-2429) and adult female dermal fibroblasts (ESCTRL#2) from healthy donors were used as controls. We derived MEFs from wild-type (WT) and three heterozygous embryos carrying the *Sall1-ΔZn<sup>2-10</sup>* mutant allele.<sup>11</sup> All the embryos were at embryonic day 13. WT and mutant alleles were detected by PCR genotyping using established methods. Cultured cells were maintained between 10 and 20 passages, tested for senescence by  $\gamma$ -H2AX staining, and grown until confluence (6-well plates for RNA extraction and western blot assays; 10 cm dishes for pull-downs). Most cells were transfected with calcium phosphate, but primary fibroblasts were transfected with Lipofectamine 3000 (Invitrogen). To induce primary cilia, we starved cells for 24 or 48 hr (DMEM, 0.1% FBS, 1% penicillin, and streptomycin). In the case of HEK293FT cells, we followed the conditions recently reported.<sup>26</sup> The use of human samples in this study was approved by the ethics committee at CIC bioGUNE, and appropriate informed consent was obtained from human subjects. Work with mouse embryos to derive MEFs was approved by Saint Louis University. All experiments conformed to the relevant regulatory standards.

### Plasmid Construction

A full-length (FL) human *SALL1* clone was used for high-fidelity PCR amplification and subcloning into *EYFP-N1* (Clontech) as truncated (*SALL1*<sup>c.826C>T</sup>-YFP) or FL (*SALL1*<sup>FL</sup>-YFP) versions. Clones, corresponding to current annotations, were validated by Sanger sequencing (GenBank: NM\_002968.2). We exchanged *EYFP* for two copies of the *HA* tag to build *SALL1*<sup>FL</sup>-2xHA. For BioID vectors, Ac5-STABLE2-neo<sup>27</sup> was modified to contain a CAG promoter, a *Myc*-tagged version of BirA (R118G, human codon optimized), and a multiple cloning site into which *SALL1*<sup>c.826C>T</sup> or *SALL1*<sup>FL</sup> was inserted.<sup>28</sup> Lentiviral expression vectors were prepared in *Lentilox-GFS-IRESpuro*, a derivative of *LL3.7* (*GFS* = *GFP-FLAG-STREP*).<sup>29</sup>

### SALL1 Proximity Proteomics

With the BioID method,<sup>28</sup> proteins in close proximity to SALL1 were biotinylated by fusion to a promiscuous form of the enzyme BirA (BirA\*) and isolated by streptavidin-bead pull-downs. *Myc-BirA*\*-*SALL1*<sup>c.826C>T</sup> or *Myc-BirA*\*-*SALL1*<sup>FL</sup> was transfected in

HEK293FT cells (five 10 cm dishes per condition). 24 hr after transfection, medium was supplemented with biotin at 50  $\mu$ M. Cells were collected after 48 hr, washed three times on ice with cold phosphate-buffered saline (PBS), and scraped in lysis buffer (8 M urea, 1% SDS, 1 $\times$  protease inhibitor cocktail [Roche], and 1 $\times$  PBS; 1 mL per 10 cm dish). At room temperature, samples were sonicated and cleared by centrifugation. Cell lysates were incubated overnight with 40  $\mu$ L of equilibrated NeutrAvidin-agarose beads (Thermo Scientific). Beads were subjected to stringent washes using the following washing buffers (WBs), all prepared in PBS: WB1 (8 M urea and 0.25% SDS), WB2 (6 M guanidine-HCl), WB3 (6.4 M urea, 1 M NaCl, and 0.2% SDS), WB4 (4 M urea, 1 M NaCl, 10% isopropanol, 10% ethanol, and 0.2% SDS), WB5 (8 M urea and 1% SDS), and WB6 (2% SDS). For elution of biotinylated proteins, beads were heated at 99°C in 50  $\mu$ L of elution buffer (4 $\times$  Laemmli buffer and 100 mM DTT). Beads were separated by centrifugation (18,000  $\times$  g for 5 min) or alternatively removed by centrifugation through a 0.8  $\mu$ m filter (Vivaspin, Sartorius). Samples were used for mass spectrometry (MS) analysis as well as for western blotting for validation of selected candidates.

### Mass Spectrometry

Three independent pull-down experiments were analyzed by MS. Samples eluted from the NeutrAvidin beads were separated in SDS-PAGE and stained with Brilliant Blue G-Colloidal Concentrate (Sigma) according to the manufacturer's instructions. The entire gel lanes were excised, divided into pieces, and destained, and proteins were reduced and alkylated before being *in situ* digested with trypsin. The resulting peptide mixtures were extracted, concentrated, and analyzed with an EASY nLC system (Proxeon). Peptides were ionized with a Proxeon ion source and sprayed directly into the mass spectrometer (Q-Exactive, Thermo Scientific). MaxQuant software (version 1.4.0.3) was used for the processing and analysis of recorded liquid chromatography tandem MS (LC-MS/MS) raw files with default parameters and applying a 1% false-discovery rate at both the peptide and protein levels. Label-free quantitation based on summed extracted peptide ion chromatograms was used for identifying differentially interacting proteins.

The lists of proteins identified by LC-MS/MS were analyzed as follows: only proteins identified by more than one peptide and present in at least two out of the three experiments were considered for analysis. Protein IDs were ranked according to the number of peptides found and their corresponding intensities. Hits were classified into those that interact with both FL and truncated SALL1<sup>P-Arg276\*</sup> and those interacting preferentially with one or the other. A threshold of 2-fold change in iBAQ (intensity-based absolute quantification) value was considered significant. For each experiment, calculation took into account a baseline that corresponded to the minimum value of iBAQ registered for every specific sample.

Enrichment of Gene Ontology (GO) terms was analyzed with g:Cocoa, a tool integrated in the g:Profiler web server.<sup>30</sup> GO enrichment was obtained by calculation of the  $-\log_{10}$  of the p value.

### Western Blot Analysis

Cells were lysed in cold RIPA buffer supplemented with 1 $\times$  protease inhibitor cocktail (Roche). Lysates were kept on ice for 30 min with vortexing every 5 min and then cleared by centrifugation (25,000  $\times$  g for 20 min at 4°C). Supernatants were collected, and protein contents were quantified by a BCA protein quantifi-

cation assay (Pierce). After SDS-PAGE and transfer to nitrocellulose or polyvinylidene fluoride, membranes were blocked in 5% milk in 1 $\times$  PBS and 0.1% Tween-20. For anti-biotin, blocking was performed in casein. In general, primary antibodies were applied overnight at 4°C, and secondary antibodies were applied for 1 hr at room temperature. Antibodies used included CCP110 (Proteintech; 1:1,000), CEP97 (Proteintech; 1:1,000), Biotin (Biotin-HRP Cell Signaling; 1:2,000), HA (Sigma; 1:1,000), GFP (Roche; 1:1,000), tubulin-HRP (Proteintech; 1:2,000), GAPDH-HRP (Proteintech; 1:1,000), and Actin (Sigma; 1:1,000). The anti-SALL1 antibodies used detect specifically SALL1<sup>FL</sup> (R&D; aa 258–499) or the N-terminal part of SALL1.<sup>6</sup> Secondary antibodies were HRP-conjugated anti-mouse or anti-rabbit (Jackson ImmunoResearch). Proteins were detected with Clarity ECL (BioRad) or Super Signal West Femto (Pierce). Quantification of bands was performed with ImageJ software and normalized against actin or GAPDH levels. At least three independent blots were quantified per experiment.

### GFP Pull-Downs

All steps were performed at 4°C. HEK293FT-transfected cells were collected after 48 hr, washed three times with 1 $\times$  PBS, and lysed in 1 mL of lysis buffer (25 mM Tris-HCl [pH 7.5], 150 mM NaCl, 1 mM EDTA, 1% NP-40, 0.5% Triton X-100, 5% glycerol, and protease inhibitors [Roche]). Lysates were kept on ice for 30 min with vortexing every 5 min and spun down at 25,000  $\times$  g for 20 min. After 40  $\mu$ L of supernatant (input) was saved, the rest was incubated overnight with 30  $\mu$ L of pre-washed GFP-Trap resin (Chromotek) in a rotating wheel. Beads were washed five times for 5 min each with WB (25 mM Tris-HCl [pH 7.5], 300 mM NaCl, 1 mM EDTA, 1% NP-40, 0.5% Triton X-100, and 5% glycerol). Beads were centrifuged at 2,000  $\times$  g for 2 min after each wash. For elution, samples were boiled for 5 min at 95°C in 2 $\times$  Laemmli buffer.

### Immunoprecipitation

All steps were performed at 4°C. HEK293FT-transfected cells were collected after 48 hr, washed 3 times with 1 $\times$  PBS, and lysed in 1 mL of lysis buffer (20 mM Tris-HCl [pH 7.5], 137 mM NaCl, 2 mM EDTA, 1% NP-40, 5% glycerol, and protease inhibitor mixture [Roche]). Lysates were processed as described for GFP pull-downs. The rest was incubated overnight with 1  $\mu$ g of CCP110 or CEP97 antibody (Proteintech) and for an additional 4 hr with 40  $\mu$ L of pre-washed Protein G Sepharose 4 Fast Flow beads (GE Healthcare) in a rotating wheel. Beads were washed five times for 5 min each with WB (10 mM Tris-HCl [pH 7.5], 137 mM NaCl, 1 mM EDTA, and 1% Triton X-100). Beads were centrifuged at 2,000  $\times$  g for 2 min after each wash. For elution, samples were boiled for 5 min at 95°C in 2 $\times$  Laemmli buffer.

### Immunostaining

hTERT-RPE cells, U2OS cells, and primary fibroblasts from control and TBS individuals were seeded on 11 mm coverslips (25,000 cells per well on a 24-well plate). We plated HEK293FT cells on coverslips coated with 0.01% poly-L-lysine (Sigma) to enhance adhesion. After being washed three times with cold 1 $\times$  PBS, cells were fixed with 4% paraformaldehyde (PFA), 0.1% Triton X-100 in 1 $\times$  PBS for 20 min on ice, and then washed three times with 1 $\times$  PBS or pre-permeabilized for 2 min in PTEM buffer (20 mM PIPES [pH 6.8], 0.2% Triton

X-100, 10 mM EGTA, and 1 mM MgCl<sub>2</sub>)<sup>31</sup> and fixed for 10 min with 4% PFA for centrosomal staining. Blocking was performed for 1 hr at 37°C in blocking buffer (BB: 2% fetal calf serum and 1% BSA in 1× PBS). Primary antibodies were incubated overnight at 4°C, and cells were washed with 1× PBS three times. To label the ciliary axoneme as well as the basal body and pericentriolar regions, we used mouse antibodies against acetylated alpha-tubulin (Sigma) and gamma-tubulin (Sigma) or rabbit antibodies against ARL13B (Proteintech) and pericentrin (Covance; 1:160). Other antibodies included were mouse anti-SALL1 (R&D; 1:100), rabbit anti-CCP110 (Proteintech; 1:100), rabbit anti-CEP97 (Proteintech; 1:100), mouse monoclonal anti-CEP164 (Genetex; 1:100), rabbit anti-ODF2 (Atlas; 1:100), and mouse anti-phospho-Histone H2A.X (Millipore; 1:500).

Donkey anti-mouse or anti-rabbit secondary antibodies (Jackson ImmunoResearch) conjugated to Alexa 488 or 568 (1:200) were incubated for 1 hr at 37°C and then nuclear stained with DAPI (Sigma; 10 min; 300 ng/mL in PBS). Transfected HEK293FT cells with *Myc-BirA\*-SALL1<sup>c.826C>T</sup>* or *Myc-BirA\*-SALL1<sup>FL</sup>* were incubated with 50 μM biotin for 24 hr, washed, fixed, and stained with Alexa-594-conjugated Streptavidin (Jackson ImmunoResearch; 1:100). Fluorescence imaging was performed with an upright fluorescent microscope (Axioimager D1, Zeiss) or confocal microscope (Leica SP2) with a 40×, 63×, or 100× objective. For cilia measurements and counting, primary cilia from at least 15 different fluorescent micrographs from each experimental condition were analyzed with the ruler tool from Adobe Photoshop. We calculated cilia frequency by dividing the number of total cilia by the number of cells on each micrograph. The number of cells per micrograph was similar in both TBS and control fibroblasts. To obtain the level of fluorescence in a determined region, we calculated the corrected total cell fluorescence as previously described<sup>32</sup> by using parameters obtained by ImageJ.

### qPCR Analysis

TBSP<sup>Pro332Hisfs\*10</sup> and control fibroblasts were starved for 24 hr, and then they were either treated or not with purmorphamine for 24 or 48 hr (while starvation conditions were maintained) to induce the SHH signaling pathway. Total RNA was obtained with the EZNA Total RNA Kit (Omega) and quantified with a Nanodrop spectrophotometer. cDNAs were prepared with the SuperScript III First-Strand Synthesis System (Invitrogen) in a 20 μL volume per reaction. *GLII*, *PTCH1*, and control *GAPDH* primers were tested for efficiency, and products were checked for the correct size before being used in test samples. qPCR was done with Mi-Hot Taq Mix (Metabion). Reactions were performed in 10 μL by the addition of 1 μL of cDNA, 20× Evagreen (Biotium), and 0.5 μL of each primer (10 μM) to a CFX96 thermocycler (Bio-Rad) according to the following protocol: 95°C for 10 min and 40 cycles of 95°C for 10 s and 60°C for 30 s. Melting curve analysis was performed for each pair of primers between 65°C and 95°C with 0.5°C temperature increments every 5 s. Relative gene expression data were analyzed by the ΔΔCt method. Reactions were done in triplicates, and results were derived from at least three independent experiments normalized to *GAPDH* and presented as relative expression levels. Individual expression values were normalized to *GAPDH*. Primer sequences were as follows: *GLII-F*, 5'-AGCCTT CAGCAATGCCAGTGAC-3'; *GLII-R*, 5'-GTCAGGACCATGCACT GTCTTG-3'; *PTCH1-F*, 5'-CTCATATTTGCCCTCG-3'; *PTCH1-R*, 5'-TCTCCAATCTTCTGGCGAGT-3'; *GAPDH-F*, 5'-AGCCACAT

CGCTCAGACAC-3'; and *GAPDH-R*, 5'-GCCCAATACGACCAA ATCC-3'.

### CRISPR/Cas9 Genome Editing

We performed CRISPR/Cas9 targeting of the *SALL1* locus to generate a HEK293FT cell line carrying a TBS-like allele. We used online resources (CRISPRdesign and CRISPOR) to search for high-scoring sites in proximity to the site mutated in the TBS<sup>p.Pro332Hisfs\*10</sup> fibroblasts. We chose the highest-scoring sgRNA target to design our vectors. All constructs were confirmed by sequencing, and cloning details are available upon request. Transient transfection and puromycin selection were followed by single-cell cloning and screening. After CRISPR/Cas9-mediated cutting, the resulting repair gave rise to the single-base insertion c.1003dup in *SALL1*; this change is predicted to give rise to the following protein: SALL1<sup>p.Ser335Lysfs\*20</sup>. This mutation was confirmed to be heterozygous by Sanger sequencing of a pooled mutant and WT amplicon, as well as individual sequencing of TOPO-cloned amplicons (both mutant and WT were detected).

Using the same online resources, we chose six of the highest-scoring off-target sites for additional analysis (mm2\_exon\_SALL1P1\_chrX\_49432372, mm4\_exon\_NACA\_chr12\_57110706; mm4\_intergenic\_CDCA7L|RAPGEF5\_chr7\_22092853; mm4\_intergenic\_RNU6-996P|AL162389.1\_chr9\_110472444; mm4\_exon\_LEMD2\_chr6\_33744586; and mm4\_exon\_GPRIN2\_chr10\_46999700). Using genomic DNA from our targeted clone as a template, we performed PCR and Sanger sequencing. In all cases, no mutations were found.

### SALL1 Silencing

A human *SALL1* target sequence (5'-CTGCTATTTGTATTGTGC TTT-3', based on validated Mission shRNA TRCN0000003958; Merck, Sigma-Aldrich) was cloned into the inducible shRNA vector *Tet-pLKO-puro* (Addgene 21915).<sup>33</sup> Lentivirus was produced in HEK293FT cells and used for transducing and stably selecting HEK293FT cells with puromycin (1 μg/mL). *SALL1* silencing was induced for 72 hr with doxycycline (1 μg/mL).

### Lentiviral Transduction

Lentiviral expression constructs were packaged with psPAX2 and pVSVG (Addgene) in HEK293FT cells, and lentiviral supernatants were used for transducing Shh-LIGHT2 and hTERT-RPE1 cells. Stable-expressing populations were selected with puromycin (1 μg/mL). For primary fibroblasts, lentiviral supernatants were concentrated 100-fold before use (Lenti-X concentrator, Clontech).

### Luciferase Assays

Firefly luciferase expression was measured with the Dual-Luciferase reporter system (Promega) according to the manufacturer's instructions. For each construct, we divided luciferase activity upon purmorphamine treatment by the activity of cells before purmorphamine induction to obtain the fold-change value. Luminescence was measured, and data were normalized to the *Renilla* luciferase readout. Experiments were performed with both biological and technical replicates (n = 8).

### Statistical Analysis

Statistical analyses were performed with GraphPad 6.0 software. Data were analyzed by the Shapiro-Wilk normality test and Levene's test of variance. We used two-tailed unpaired Student's



t tests or Mann-Whitney U tests for comparing two groups and one-way ANOVA or the Kruskal-Wallis test for more than two groups. Significance was considered when  $p < 0.05$ .

## Results

### TBS-Derived Cells Show Increased Cilia Frequency and Length

On the basis of the phenotypic characteristics found in TBS individuals, we hypothesized that the formation of primary cilia might be altered in TBS cells. Therefore, we checked cilia assembly and disassembly in fibroblasts derived from both control (HFFs) and TBS (TBS<sup>p.Pro332Hisfs\*10</sup>) individuals (see [Material and Methods](#)).<sup>3,8</sup> We induced the assembly of primary cilia by starving cells at high confluence for 48 hr, whereas we induced cilia disassembly by adding complete media to ciliated cells that had previously been subjected to serum starvation. We quantified the frequency of ciliation and the length of primary cilia at all mentioned time points. TBS fibroblasts formed primary cilia at a significantly higher frequency when the cells were not subjected to starvation ([Figures 1A–1C](#)). 7.9% of the control cells (versus 24.7% of the TBS cells) exhibited a primary cilium in cycling conditions ([Figure 1C](#)). TBS cells were also significantly more ciliated than control fibroblasts upon 48 hr of starvation. In those conditions, 36.1% of the control cells (versus 78.8% of the TBS fibroblasts) displayed a primary cilium. In addition, TBS cells were significantly more ciliated 30 min and 2 hr after serum induction ([Figure 1C](#)). Whereas 100% of the control cells had completely dismantled their cilia 24 hr after cilia disassembly was induced, 12% of the TBS fibroblasts were still ciliated (data not shown). Furthermore, primary cilia were significantly longer in TBS cells upon 48 hr of starvation than in control cells (average 3.2  $\mu\text{m}$  in control versus 3.7  $\mu\text{m}$  in TBS cells) ([Figure 1D](#)). Cilia were significantly longer in TBS than in control cells at all the studied time points during cilia disassembly (30 min with complete medium: average 2.6  $\mu\text{m}$  in control versus 3.7  $\mu\text{m}$  in TBS cells; 2 hr with complete medium: 1.9  $\mu\text{m}$  in control versus 3  $\mu\text{m}$  in TBS cells). The observed increase in cilia frequency after the addition of complete medium in control cells is consistent with a reported reciliation wave during the first hours of cilia disassembly.<sup>34</sup> These results show that TBS cells have longer and more abundant primary cilia than control cells in all tested conditions.

As mentioned previously, it has been reported that the presence of truncated SALL1 is sufficient to cause a TBS-like phenotype in a mouse model.<sup>12</sup> To generate a mutated form for exogenous expression, we chose the mutation *SALL1*<sup>c.826C>T</sup> because it has been reported in several individuals with TBS<sup>3</sup> and is thus the most common allele in this rare syndrome. Confluent hTERT-RPE1 cells stably transduced with lentiviral *GFS-SALL1*<sup>c.826C>T</sup> displayed longer cilia (11  $\mu\text{m}$  on average) than those stable for *GFS*

alone (8  $\mu\text{m}$  on average) ([Figures 1E and 1F](#)), further confirming that the presence of a truncated form of SALL1 is sufficient to promote longer cilia. Together, these results suggest that truncated SALL1 can affect cilia frequency, as well as the dynamics of cilia assembly and disassembly.

### Truncated SALL1 Recruits SALL1<sup>FL</sup> to the Cytoplasm in TBS-Derived Fibroblasts

In humans, a truncated SALL1 was observed in B cells derived from a TBS individual,<sup>12</sup> but its presence in fibroblasts has not been reported. It was previously shown that mRNA from the truncated allele was expressed in TBS<sup>c.995delC</sup> fibroblasts,<sup>8</sup> so we checked for the presence of truncated SALL1 by western blot. For that, we took advantage of distinct antibodies recognizing different epitopes of SALL1 (see [Material and Methods](#); [Figures S1A, S1B, and S2](#)), which allowed us to distinguish SALL1<sup>FL</sup> from the truncated forms. Using an antibody directed against the N-terminal portion of SALL1, we identified a truncated protein of about 62 kDa in TBS<sup>p.Pro332Hisfs\*10</sup> cells but not in control fibroblasts ([Figure S1C](#)). Furthermore, SALL1<sup>FL</sup> was less abundant in TBS cells than in control HFFs. As previously reported, the observed size of SALL1 by western blot was higher than expected.<sup>12</sup>

SALL1<sup>FL</sup> proteins are normally enriched in the nucleus, whereas truncated forms have been observed in both the nucleus and cytoplasm.<sup>7,35</sup> These studies used overexpression of truncated murine or chicken forms of *Sall1*, which induced a mislocalization of SALL1<sup>FL</sup> into the cytoplasm, most likely as a result of the interaction of the different SALL1 proteins through their glutamine-rich domains.<sup>7,35</sup> We therefore analyzed whether the reported change in localization of endogenous SALL1 was also occurring in human TBS<sup>p.Pro332Hisfs\*10</sup> cells. By immunofluorescence, TBS<sup>p.Pro332Hisfs\*10</sup> fibroblasts presented abnormal cytoplasmic staining of SALL1<sup>FL</sup> ([Figures S3A and S3B](#)). We quantified the fluorescence intensity of SALL1<sup>FL</sup> in the nuclei and cytoplasm in both control HFFs and TBS<sup>p.Pro332Hisfs\*10</sup> human fibroblasts. SALL1<sup>FL</sup> intensity was significantly lower in the nuclei but significantly higher in the cytoplasm of TBS fibroblasts, leading to a decrease in the nuclear/cytoplasmic ratio ([Figure S3C](#)). No significant differences in nuclear or cytoplasmic size were found between control and TBS fibroblasts, indicating that the changes in intensity were not due to differences in size ([Figure S3D](#)).

To check whether the presence of the truncated protein in human cells is sufficient to produce the localization change of SALL1<sup>FL</sup>, we transiently transfected U2OS cells with *SALL1*<sup>FL-2xHA</sup>, with *SALL1*<sup>c.826C>T-YFP</sup>, or with a combination of both. As expected, SALL1<sup>p.Arg276\*-YFP</sup> localization was diffuse in the nucleus and cytoplasm ([Figure S1D](#)), whereas SALL1<sup>FL</sup> localization was limited to the nuclei in a typical pattern of subnuclear spots ([Figure S1E](#)). However, in the presence of SALL1<sup>p.Arg276\*</sup>, SALL1<sup>FL</sup> changed its localization and colocalized with SALL1<sup>p.Arg276\*</sup> ([Figure S1F](#)).

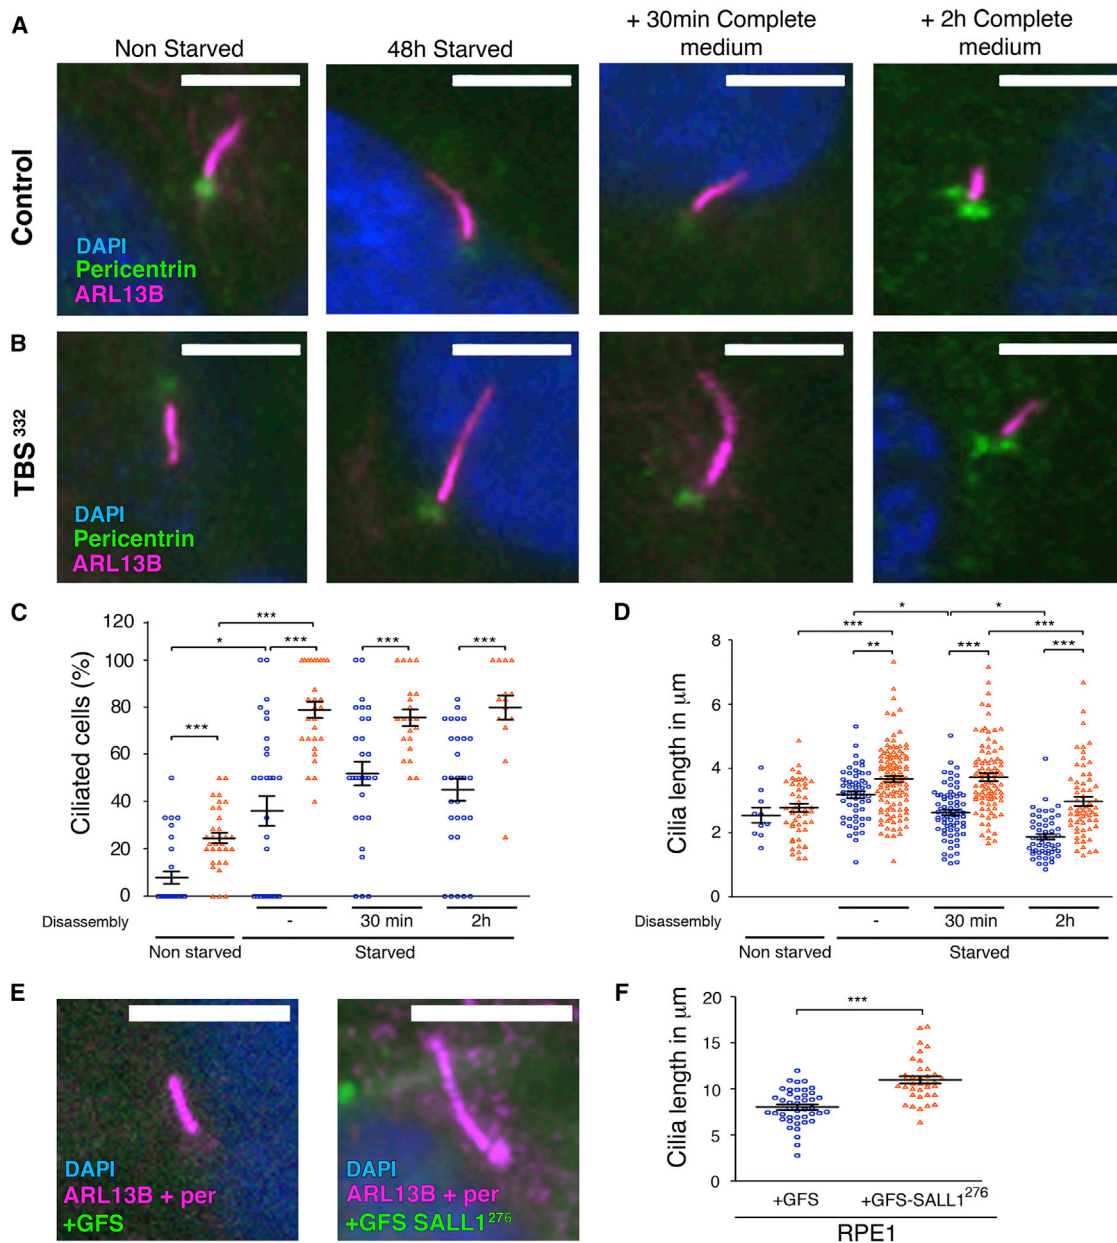

**Figure 1. TBS<sup>P.Pro332Hisfs\*10</sup> Cells Show Aberrant Cilia Frequency and Length**

(A and B) Micrographs of control HFFs (A) or TBS<sup>P.Pro332Hisfs\*10</sup> cells (TBS<sup>332</sup>) (B) analyzed during cilia assembly and disassembly. Cilia were visualized by ARL13B (purple), basal bodies were visualized by pericentrin (green), and nuclei were visualized by DAPI (blue).

(C and D) Graphical representation of cilia frequency (C) and cilia length (D) measured in control HFFs (blue circles; n = 58 cilia) or TBS<sup>332</sup> cells (orange triangles; n = 116 cilia) from three independent experiments. Cells that underwent 48 hr of starvation were compared with non-starved cells. After starvation, cells were supplied with serum for 30 min or 2 hr (n = 21–30 micrographs for all cases).

(E) Micrographs of RPE1 cells infected with lentivirus expressing *GFS* alone (left) or *GFS-SALL1<sup>c.826C>T</sup>* (*GFS-SALL1<sup>276</sup>*; right) and labeled with ARL13B (purple) and DAPI (blue).

(F) Graphical representation of cilia length measured in control (blue circles; n = 43 cilia) or *GFS-SALL1<sup>276</sup>* (orange triangles; n = 36 cilia) RPE1 cells infected as in (E).

Graphs represent mean and SEM of three independent experiments. p values were calculated with a two-tailed unpaired Student's t test: \*p < 0.05, \*\*p < 0.01, \*\*\*p < 0.001. Scale bars, 5 μm.

### New TBS-Derived Cell Line Exhibits Cilia Alterations

To further verify these results, we analyzed the amount of SALL1 and cilia formation in fibroblasts derived from an additional individual referred to as TBS<sup>P.Arg276\*</sup>

(Figure 2A). Of note, this is the same truncation that was used in our exogenous expression constructs (i.e., *SALL1<sup>c.826C>T</sup>*). When analyzing TBS<sup>P.Arg276\*</sup> cells, we observed less SALL1<sup>FL</sup> than in control ESCTRL#2

**A**

|                    |                                                 |
|--------------------|-------------------------------------------------|
| Patient Code       | UKTBS #3                                        |
| Age (years)        | 8                                               |
| Sex                | Male                                            |
| Anus               | Imperforate anus                                |
| Hands              | Triphalangeal thumbs                            |
| Ears               | Microtia                                        |
| Hearing            | Sensorineural hearing loss                      |
| Mental retardation | No abnormality reported                         |
| Kidneys            | Dysplastic                                      |
| Renal function     | Reduced clearance                               |
| Feet               | Overlapping toes                                |
| Urogenital         | No abnormality reported                         |
| Heart              | Ventricular septum defect (closed by 18 months) |

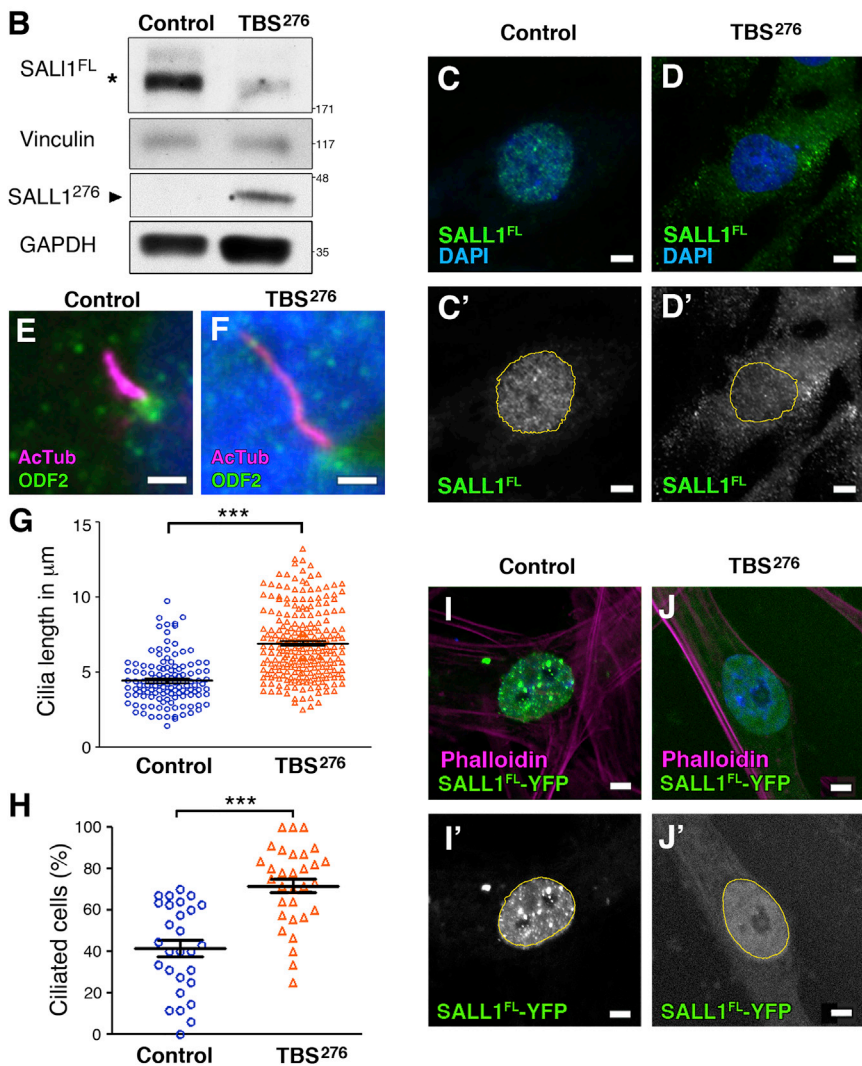

cells and the presence of a new band of about 42 kDa, consistent with a truncated SALL1 (Figure 2B and Figure S2). Interestingly, localization of SALL1<sup>FL</sup> was also altered in human TBS<sup>P.Arg276\*</sup> cells (Figures 2C and 2D). Furthermore, compared with control ESCRTL#2 cells, TBS<sup>P.Arg276\*</sup> cells displayed longer and more abundant cilia in confluent starved conditions, similar to what was observed in TBS<sup>P.Pro332Hisfs\*10</sup> cells (Figures 2E–2H). To check whether the presence of the truncated protein

in primary human cells is sufficient to produce the localization change of SALL1<sup>FL</sup>, we transiently transfected control and TBS<sup>P.Pro332Hisfs\*10</sup> cells with SALL1<sup>FL</sup>-YFP. SALL1<sup>FL</sup> localization was limited to the nuclei in control fibroblasts (Figure 2I), whereas its localization was diffuse in the nucleus and cytoplasm in TBS<sup>P.Arg276\*</sup> cells (Figure 2J). Thus, truncated SALL1 is present in TBS-derived cells and leads to altered SALL1<sup>FL</sup> localization, most likely through recruitment to the cytoplasm. As a result, the truncated SALL1, SALL1<sup>FL</sup>, or both can potentially interact and interfere with other proteins.

**Figure 2. Fibroblasts Derived from an Additional TBS Individual Exhibit Cilia Anomalies**

(A) Clinical findings in individual TBS<sup>P.Arg276\*</sup> (TBS<sup>276</sup>).

(B) Western blot analysis of lysates from control ESCRTL#2 and TBS<sup>276</sup>. Samples were run in duplicate on the same gel and probed against SALL1<sup>FL</sup> (asterisk, R&D antibody) or against SALL1<sup>276</sup> (black arrowhead, N-terminal specific antibody<sup>6</sup>) TBS<sup>276</sup> cells encoded with a ~48 kDa truncated protein that positively reacts against SALL1 antibody. Vinculin and GAPDH were used as loading controls. Molecular-weight markers are shown to the right.

(C and D) Confocal micrographs showing endogenous SALL1<sup>FL</sup> localization in control ESCRTL#2 (C) or TBS<sup>276</sup> (D) fibroblasts detected by FL-specific antibody (R&D). DAPI was used to label the nuclei (blue), and black and white images show the single green channel. Scale bars, 5 μm.

(E and F) Immunofluorescence micrographs showing cilia marked with acetylated tubulin (purple), basal bodies marked with ODF2 (green), and nuclei marked with DAPI (blue) in control ESCRTL#2 and TBS<sup>276</sup> fibroblasts. Pictures were taken with a Zeiss Axioimager D1 fluorescence microscope with a 63× objective. Scale bars, 2.5 μm.

(G and H) Graphical representation of cilia length measurements (G; n = 123 and 235 cilia for control ESCRTL#2 and TBS<sup>276</sup> fibroblasts, respectively) and cilia frequency (H; n = 28 and 31 micrographs for control ESCRTL#2 and TBS<sup>276</sup> fibroblasts, respectively) of micrographs as shown in (E) and (F). Three independent experiments were pooled together. The graphs represent the mean and SEM. The p values were calculated with a two-tailed unpaired Student's t test: \*\*\*p < 0.001.

(I and J) Confocal micrographs showing SALL1<sup>FL</sup>-YFP localization in control ESCRTL#2 and TBS<sup>276</sup> fibroblasts. Actin is labeled by phalloidin (purple), and nuclei are labeled by DAPI (blue). Black and white images show the single green channel. Scale bars, 5 μm.

in primary human cells is sufficient to produce the localization change of SALL1<sup>FL</sup>, we transiently transfected control and TBS<sup>P.Pro332Hisfs\*10</sup>



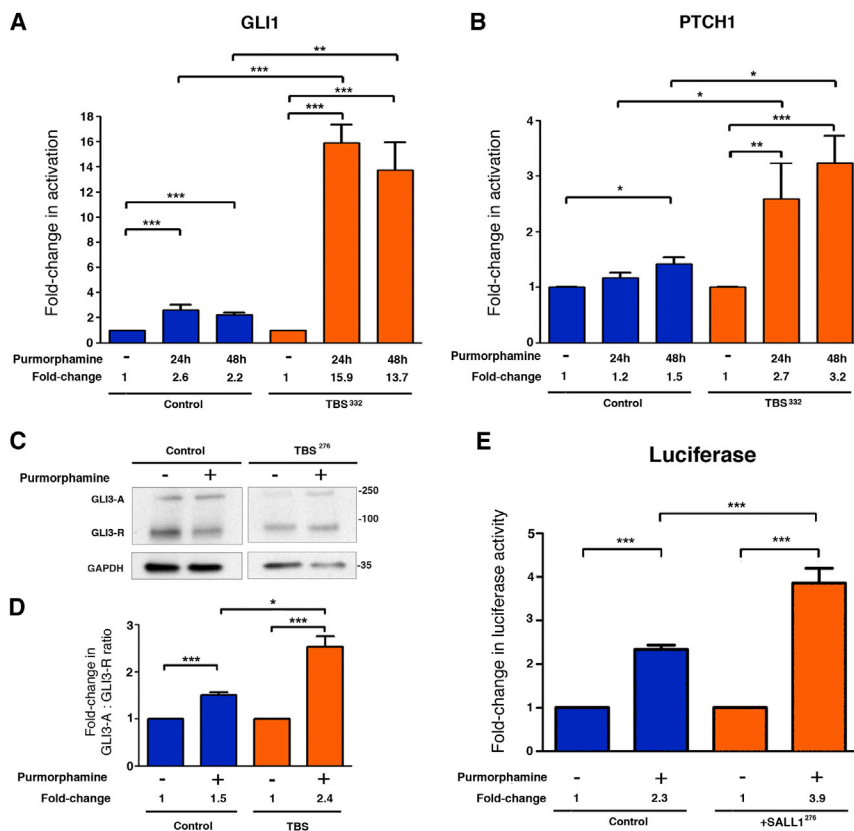

**Figure 3. TBS<sup>P.Pro332Hisfs\*10</sup> Fibroblasts Show Aberrant SHH Signaling**

(A and B) Graphical representation of the fold change of activation based on the relative expression of *GLI1* (A) and *PTCH1* (B) obtained by qPCR from control HFFs (n = 4; blue bars) or TBS<sup>P.Pro332Hisfs\*10</sup> fibroblasts (TBS<sup>332</sup>) (n = 4; orange bars) either treated or not (-) with purmorphamine for the indicated times. Numerical values for the fold change are indicated.

(C) Western blot analysis of lysates from control ESCTRL#2 and TBS<sup>P.Arg276\*</sup> (TBS<sup>276</sup>). Samples were probed against GLI3 (A, activator; R, repressor), and GAPDH was used as a loading control. Molecular-weight markers are shown to the right.

(D) Graphical representation is shown for the fold change of the GLI3-A:GLI3-R ratios obtained in (C) for control and TBS fibroblasts. Data from at least three independent experiments using ESCTRL#2 (control; n = 3; blue bars) and TBS (TBS<sup>276\*</sup> and TBS<sup>332</sup>; pooled; n = 5; orange bars) are shown.

(E) Graphical representation of the fold change in luciferase activation when Shh-LIGHT2 control cells (n = 8; blue bars) or cells expressing the mutated form *GFS-SALL1<sup>c.826C>T</sup>* (SALL1<sup>276</sup>; n = 8; orange bars) were either treated (+) or not (-) with purmorphamine.

All graphs represent the mean and SEM. p values were calculated with a two-tailed unpaired Student's t test: \*p < 0.05, \*\*p < 0.01, \*\*\*p < 0.001.

### TBS-Derived Cells Exhibit Aberrant Sonic Hedgehog Signaling

It is well established that SHH signal transduction is dependent on the presence of functional primary cilia in mammals.<sup>18,19</sup> Therefore, we examined whether SHH signaling is compromised in TBS<sup>P.Pro332Hisfs\*10</sup> cells. We starved cells for 24 hr and incubated in the presence or absence of purmorphamine (a SMO agonist) for 24 or 48 hr to activate the SHH pathway. mRNA expression of two SHH target genes (*GLI1* and *PTCH1*) was quantified by qRT-PCR (Figures 3A and 3B). We found that, after induction by purmorphamine for 24 or 48 hr, the relative increases in expression (fold change) of *GLI1* and *PTCH1* were higher in TBS cells than in control HFFs. To further study the role of SALL1 truncations in SHH signaling, we analyzed GLI3 processing by western blot analysis using total lysates extracted from control and TBS fibroblasts (Figure 3C). We found that the increase in the GLI3-A/GLI3-R ratio (activator/repressor) upon purmorphamine treatment was significantly higher in TBS cells than in control fibroblasts (Figures 3C and 3D). We also examined the effects of truncated SALL1 on SHH signaling by using Shh-LIGHT2 cells.<sup>25</sup> These are NIH 3T3 mouse fibroblasts that carry an incorporated SHH reporter (firefly luciferase under the control of the *Gli3*-responsive promoter). We observed aberrations in SHH signaling between Shh-LIGHT2 cells stably express-

ing *GFS-SALL1<sup>c.826C>T</sup>* and controls (Figure 3E). Like TBS-derived cells, Shh-LIGHT2 cells overexpressing *GFS-SALL1<sup>c.826C>T</sup>* were more sensitive to SHH induction than control cells (2.3-fold induction in control cells versus 3.8-fold induction in cells expressing *GFS-SALL1<sup>c.826C>T</sup>*). Defects in *PTCH1* and *GLI1* expression (endogenous or via reporter assay) and impaired GLI3 processing confirm that truncated SALL1 proteins found in TBS might cause not only defects in ciliogenesis but also defects in SHH signaling.

### Proximity Proteomics of SALL1 Identifies Interactions with Cilia Regulators

Given that truncated SALL1 proteins and SALL1<sup>FL</sup> display differential subcellular localization, we reasoned that TBS might be a consequence of aberrant cytoplasmic interactions by the truncated SALL1. In order to identify those possible interactors, we applied proximity proteomics to either SALL1<sup>P.Arg276\*</sup> or SALL1<sup>FL</sup>. The BioID method<sup>28</sup> relies on a mutant BirA enzyme (BirA\*) that has a relaxed specificity and is able to biotinylate any free lysine ε-amino group present in a protein within a radius between 10 and 20 nm.<sup>36,37</sup> When fused to SALL1<sup>P.Arg276\*</sup> or SALL1<sup>FL</sup>, BirA\* can biotinylate proximal proteins that either interact directly with them or are closely associated in protein complexes.



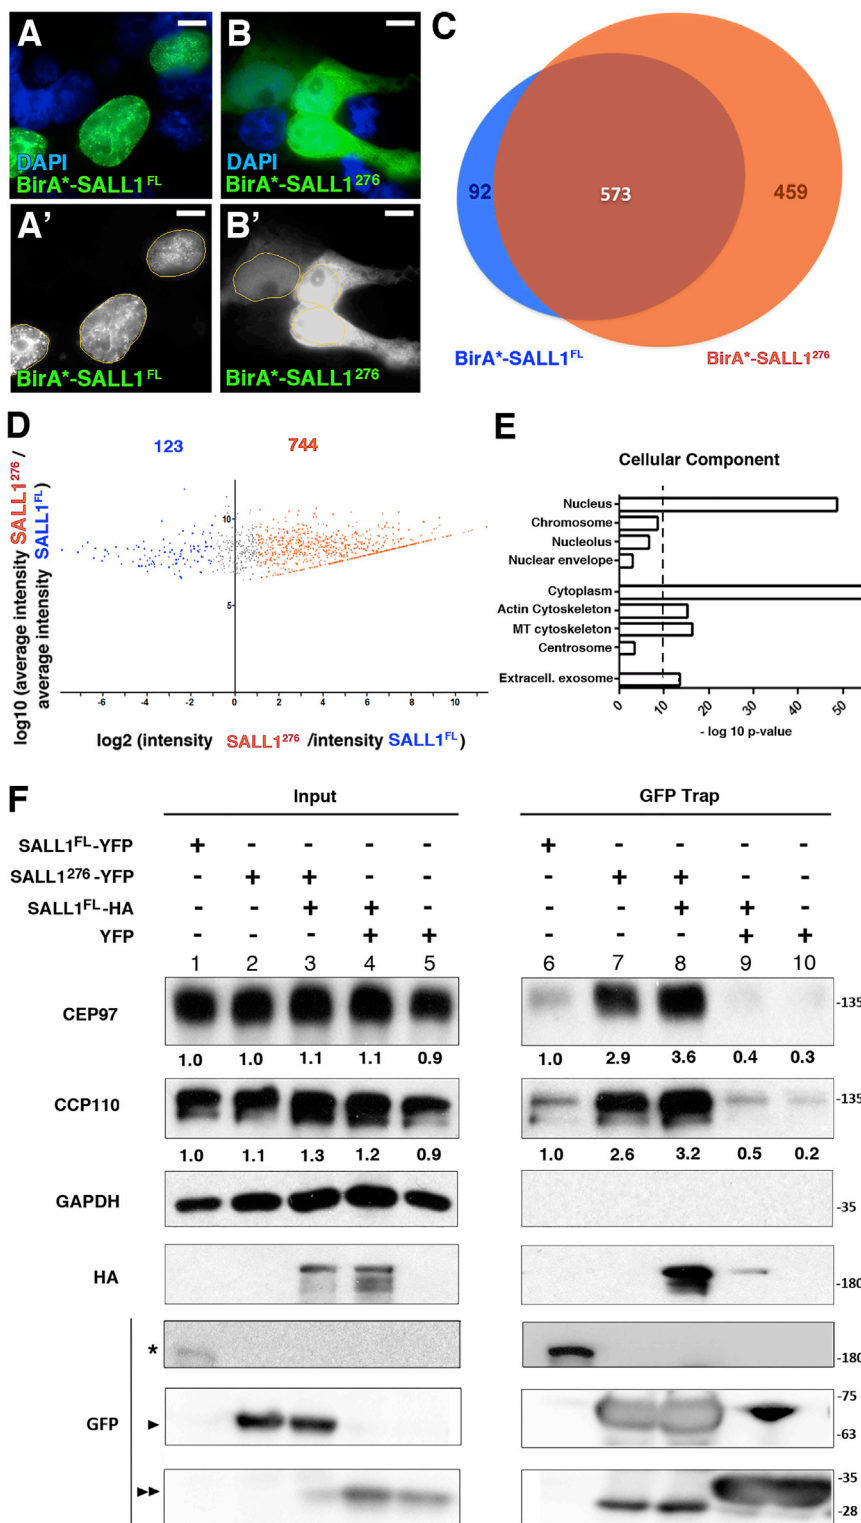

*Myc-BirA*\*-tagged *SALL1*<sup>c.826C>T</sup> or *SALL1*<sup>FL</sup> plasmids were transfected in HEK293FT cells. Staining of transfected cells for visualizing biotinylated proteins revealed that, as expected, *BirA*\*-*SALL1*<sup>p.Arg276\*</sup> was localized diffusely throughout the nucleus and cytoplasm, whereas *BirA*\*-*SALL1*<sup>FL</sup> was localized primarily in the nucleus and enriched in subnuclear domains (Figures 4A and 4B). Total

lysates from *Myc-BirA*\*-*SALL1*<sup>c.826C>T</sup> or *SALL1*<sup>FL</sup>-transiently transfected cells were subjected to NeutrAvidin pull-down, and isolated proteins were analyzed by LC-MS/MS. In addition to almost all known interactors of *SALL1*, such as NuRD complex components (HDAC1, HDAC2, RbAp46, MTA1, MTA2, MBD3, CHD4, and CHD3),<sup>38</sup> candidates with exclusive or enriched proximity to *SALL1*<sup>p.Arg276\*</sup> or *SALL1*<sup>FL</sup> were identified (Table S1). A total of 1,032 or 665 proteins were found in at least two out of three experiments done with *SALL1*<sup>p.Arg276\*</sup> or *SALL1*<sup>FL</sup>, respectively

**Figure 4. CCP110 and CEP97 Interact with Truncated SALL1**

(A and B) Confocal micrographs showing transient expression of transfected *BirA*\*-*SALL1*<sup>FL</sup> (A) or *BirA*\*-*SALL1*<sup>c.826C>T</sup> (*BirA*\*-*SALL1*<sup>276</sup>) (B) detected by fluorescence streptavidin. Nuclei are marked by DAPI in blue. Single green channels are shown in black and white (A' and B'). Scale bars, 5  $\mu$ m.

(C) Venn diagram showing the distribution of the identified candidates by MS analysis. 665 and 1,032 proteins were found in close proximity of *SALL1*<sup>FL</sup> and *SALL1*<sup>p.Arg276\*</sup> (*SALL1*<sup>276</sup>), respectively, in at least two independent experiments.

(D) Volcano plot representing the distribution of the candidates identified by proximity proteomics in at least two out of three independent experiments. Proteins with at least a 2-fold change in intensity with respect to the WT proteome ( $\log_2 \geq 1$ ) were considered *SALL1*<sup>276</sup>-associated candidates (orange dots). Proteins with less than a 2-fold change in intensity with respect to the WT proteome ( $\log_2 \leq 1$ ) were considered *SALL1*<sup>FL</sup>-associated candidates (blue dots).

(E) Graphical representation of the  $-\log_{10}$  of the p value for each of the represented cellular component GO terms. MT, microtubule; Extracell, extracellular.

(F) Western blot of inputs or GFP-Trap pull-downs performed in HEK293FT cells transfected with *SALL1*<sup>FL</sup>-YFP (lanes 1 and 6), *SALL1*<sup>c.826C>T</sup>-YFP (*SALL1*<sup>276</sup>-YFP; lanes 2 and 7), *SALL1*<sup>276</sup>-YFP together with *SALL1*<sup>FL</sup>-2xHA (*SALL1*<sup>FL</sup>-HA; lanes 3 and 8), *SALL1*<sup>FL</sup>-HA together with YFP alone (lanes 4 and 9), or YFP alone (lanes 5 and 10). Endogenous CCP110 and CEP97 were detected with specific antibodies. GAPDH was used as a loading control. Numbers under the CCP110 and CEP97 panels are the result of dividing the band intensities of each lane by that of lane 1 for the inputs or by that of lane 6 for the pull-downs. One asterisk indicates *SALL1*<sup>FL</sup>-YFP, one black arrowhead indicates *SALL1*<sup>276</sup>-YFP, and two black arrowheads indicate YFP alone. Molecular-weight markers are shown to the right.

(Figure 4C). However, out of those proteins, 744 in the SALL1<sup>p.Arg276\*</sup> subproteome and 123 in the SALL1<sup>FL</sup> subproteome were significantly enriched at least 2-fold with respect to the other subproteome according to label-free protein quantitation (Figure 4D and Table S1).

With the purpose of obtaining a functional overview of the main pathways associated with SALL1<sup>p.Arg276\*</sup>, we performed a comparative GO analysis to compare the “cellular component,” “molecular function,” and “biological process” domains (Figure 4E, Figures S4A and S4B, and Table S1). In the cellular component domain, a shift toward “cytoplasm,” “actin,” and “microtubule cytoskeleton” was observed in the SALL1<sup>p.Arg276\*</sup> proteome (Figure 4E and Table S1). Intriguingly, the “centrosome” GO term was found exclusively in the SALL1<sup>p.Arg276\*</sup> proteome. Interestingly, among genes included in this category, we found *CCP110* and *CEP97*.<sup>39</sup> The role described for these proteins in cilia formation is compatible with the phenotype observed in TBS fibroblasts, so we selected them for further study. We confirmed these proteins as proximal interactors by independent BioID experiments analyzed by western blot by using CCP110 and CEP97 antibodies. Both proteins associated preferentially with BirA\*-SALL1<sup>p.Arg276\*</sup> (Figures S4C, S4D, and S3). With respect to molecular function, SALL1<sup>p.Arg276\*</sup> showed enrichment in cytoplasmic proteins (“actin,” “microtubule binding,” “ATPase activity,” or “helicase activity” terms; Figure S4A and Table S1). In the category of biological process, the SALL1<sup>p.Arg276\*</sup> subproteome showed enrichment in the categories “cell cycle,” “cytoskeleton organization,” and “cell response to stress” (Figure S4B and Table S1).

### CCP110 and CEP97 Interact with SALL1

Most cases of TBS exhibit a monoallelic truncation of SALL1, i.e., the presence of both truncated and FL forms of SALL1. These proteins can homo- and heterodimerize, leading to aberrant complexes. To characterize the interaction between SALL1 and both CCP110 and CEP97, we performed pull-downs with tagged SALL1<sup>FL</sup>-YFP, SALL1<sup>p.Arg276\*</sup>-YFP, or a combination of both in HEK293FT cells. Our results showed that both endogenous CCP110 and CEP97 were able to bind to both SALL1<sup>FL</sup> and SALL1<sup>p.Arg276\*</sup> and bound preferentially to the truncated SALL1<sup>p.Arg276\*</sup>, confirming our MS results (Figure 4F and Figure S2, lanes 6 and 7). The binding to SALL1<sup>p.Arg276\*</sup> persisted in the presence of overexpressed SALL1<sup>FL</sup> (Figure 4F and Figure S2, lane 8), indicating that the heterodimerization of the truncated and FL forms does not inhibit the interaction with CCP110 and CEP97. Note that SALL1<sup>p.Arg276\*</sup>-YFP can interact with SALL1<sup>FL</sup>-HA (HA panel, lane 8), as previously suggested.<sup>35</sup> We further demonstrated the specificity of the interaction between SALL1 and both CCP110 and CEP97 by performing the reciprocal experiment (Figures S4E, S4F, and S2). These results support the notion that the truncated form of SALL1, either by itself or in complex with the FL form, can bind and

perhaps sequester or inhibit the important cilia regulatory factors CCP110 and CEP97.

### CCP110 and CEP97 Dynamics Are Altered in TBS Fibroblasts

One key event in ciliogenesis is the depletion of CCP110 and CEP97 from the distal end of the MC, promoting the ciliary activating program in somatic cells.<sup>39–43</sup> On the basis of the results shown above, we hypothesized that CCP110 and CEP97 might suffer displacements from the MC. In order to check this hypothesis, we analyzed their centrosomal localization in primary TBS<sup>p.Pro332Hisfs\*10</sup> fibroblasts by immunofluorescence. CCP110 was present at the MC in a higher proportion of control cells (74%) than TBS<sup>p.Pro332Hisfs\*10</sup> cells (36%) (Figures 5A and 5B). Notably, 10% of the TBS cells displayed multiple foci or more diffuse labeling of CCP110 around the centrioles, suggesting an alteration of CCP110 dynamics (Figures S5A and S5B). Furthermore, CEP97 was present at the MC in 78% of the control cells but in 33% of the TBS<sup>p.Pro332Hisfs\*10</sup> cells (Figures 5C and 5D). Therefore, the disruption in the localization of CCP110 and CEP97 by the truncated SALL1 or by the complex between SALL1<sup>FL</sup> and SALL1 truncations is a potential mechanism by which CCP110 and CEP97 might be depleted from the MC and thus lead to a higher frequency of ciliogenesis in TBS cells.

### TBS-Mimicking Cell Line Exhibits Aberrant Ciliogenesis

Our BioID experiments were done in HEK293FT cells, which express SALL1 and are capable of forming primary cilia. Therefore, we attempted to generate a TBS-like mutation in HEK293FT cells to assess the cilia phenotype. In addition, this would allow us to confirm that the observed differences in ciliogenesis are not dependent on the genetic background of the cells, given that the TBS-like model cell line could be compared with the parental cells.

We used the CRISPR/Cas9 method to target the *SALL1* locus in the “hotspot” region to approximate the mutation seen in TBS<sup>p.Pro332Hisfs\*10</sup> fibroblasts. We isolated and characterized a clone that is heterozygous for a *SALL1* mutation with a sequence-verified single-base insertion that leads to a frameshift and a truncated protein (*SALL1*<sup>c.1003dup</sup>; SALL1<sup>p.Ser335Lysfs\*20</sup>; hereinafter referred to as 293<sup>335</sup>).

In the 293<sup>335</sup> cells, we observed dramatically less SALL1<sup>FL</sup> than in unmodified cells (293<sup>WT</sup>) and the presence of a new ~48 kDa band, corresponding to truncated SALL1, that showed reactivity with SALL1 antibody, (Figure 6A and Figure S2). Interestingly, localization of SALL1<sup>FL</sup> changed in 293<sup>335</sup> cells. Whereas SALL1<sup>FL</sup> was nuclear in 293<sup>WT</sup> cells, it was diffusely localized throughout the nucleus and the cytoplasm in 293<sup>335</sup> cells (Figure 6B). Upon starvation and in confluent conditions, cilia were significantly more abundant in 293<sup>335</sup> cells (average 26%) than in 293<sup>WT</sup> cells (average 7%) (Figures 6B and 6C). Furthermore, 293<sup>335</sup> cells displayed longer cilia (7.0 μm on average) than did 293<sup>WT</sup> cells (5.1 μm on

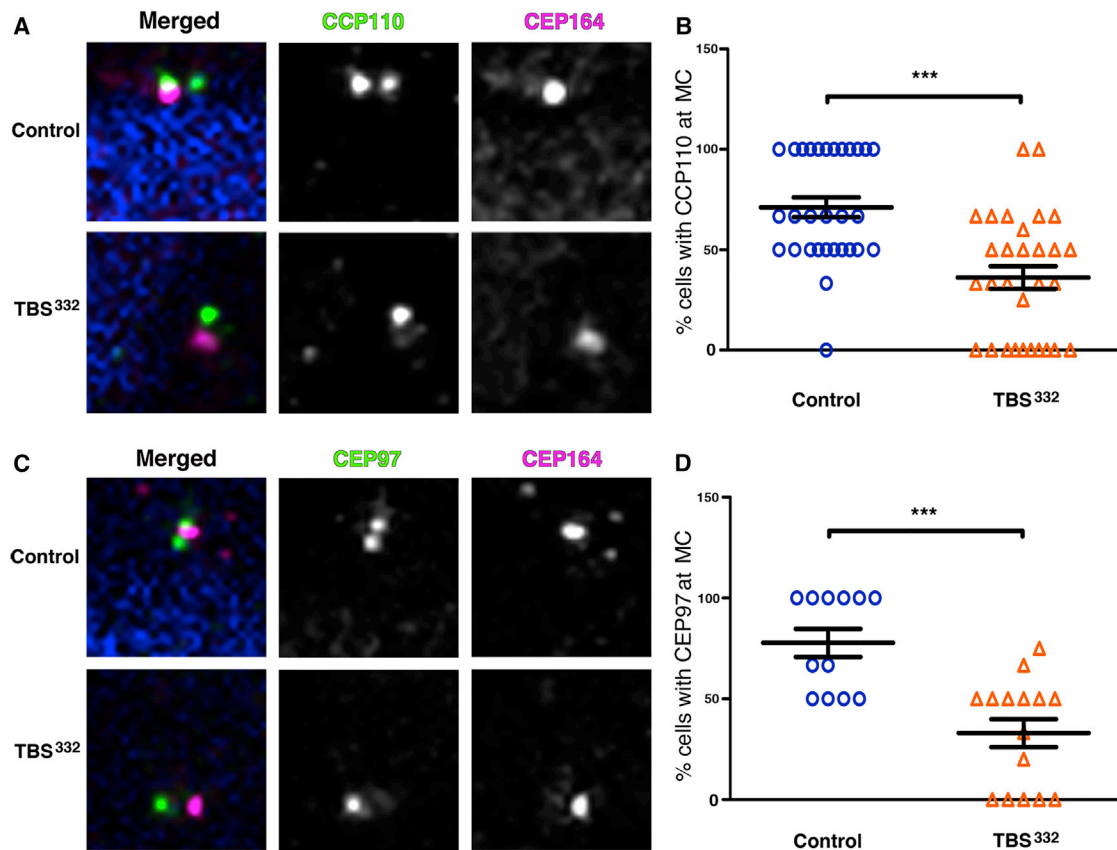

**Figure 5.** TBS<sup>P.Pro332Hisfs\*10</sup> Cells Show Changes in the Localization of CCP110 and CEP97

(A and C) Immunofluorescence micrographs of cycling human-derived fibroblasts stained with antibodies against endogenous CCP110 (A) or CEP97 (C) (green), CEP164 to label the mother centriole (MC; purple), and DAPI to label the nuclei (blue). Black and white images show the single green and purple channels. Note the different distribution of CCP110 and CEP97 to the MC between TBS<sup>P.Pro332Hisfs\*10</sup> fibroblasts (TBS<sup>332</sup>) and control HFFs.

(B and D) Graphical representation of the percentage of cells showing the presence of CCP110 or CEP97 at the MC per micrograph corresponding to the experiments in (A) or (C), respectively; n = 30 micrographs. Three independent experiments were pooled together. Pictures were taken with a Zeiss Axioimager D1 fluorescence microscope with a 63× objective. All graphs represent the mean and SEM. Scale bars, 1 μm.

average) (Figures 6B and 6D). In addition, changes in cilia length were accompanied by the absence or reduction of CCP110 foci at the MC in most of the 293<sup>335</sup> cells (Figures 7B–7D). Together, our results indicate that, compared with a control of the same genetic background, truncated SALL1 is sufficient to promote changes in cilia length and CCP110 localization.

#### Cells Derived from *Sall1-ΔZn<sup>2-10</sup>* Mouse Embryos Exhibit Aberrant Ciliogenesis

To further confirm the results shown above, we examined cells from a TBS animal model that had been previously characterized. *Sall1-ΔZn<sup>2-10</sup>* mice mimic a hotspot mutation shown to cause TBS, and they produce a truncated protein lacking most of the zinc finger motifs.<sup>11</sup> We analyzed cilia formation in MEFs. After confirming the genotype by PCR (Figure 7A), we analyzed ciliogenesis in WT (*Sall1<sup>+/+</sup>*) and heterozygous (*Sall1<sup>+/-</sup>*) MEFs. In agreement with our previous results, *Sall1<sup>+/-</sup>* MEFs displayed longer (pooled average 1 μm) and more abundant (pooled

average 59%) cilia than *Sall1<sup>+/+</sup>* MEFs (average 0.7 μm and 14%, respectively) both in starved conditions (Figures 7B–7D). In addition, the absence or reduction of CCP110 foci at the MC in most of the *Sall1<sup>+/-</sup>* cells was also observed in the MEFs (Figures 7E and 7F). In summary, we have shown that MEFs derived from a mouse TBS model reproduced the ciliary phenotype found in human TBS fibroblasts.

#### Discussion

Phenotypes observed in TBS individuals fall within the spectrum of those observed in ciliopathies, leading us to speculate that cilia malfunction and/or malformation are contributing factors in the TBS-related limb, ear, anus, and kidney problems. Our work provides this mechanistic connection between truncated SALL1 and primary cilia, offering new clues about TBS etiology. In addition to its function as a transcription factor in the nucleus, SALL1



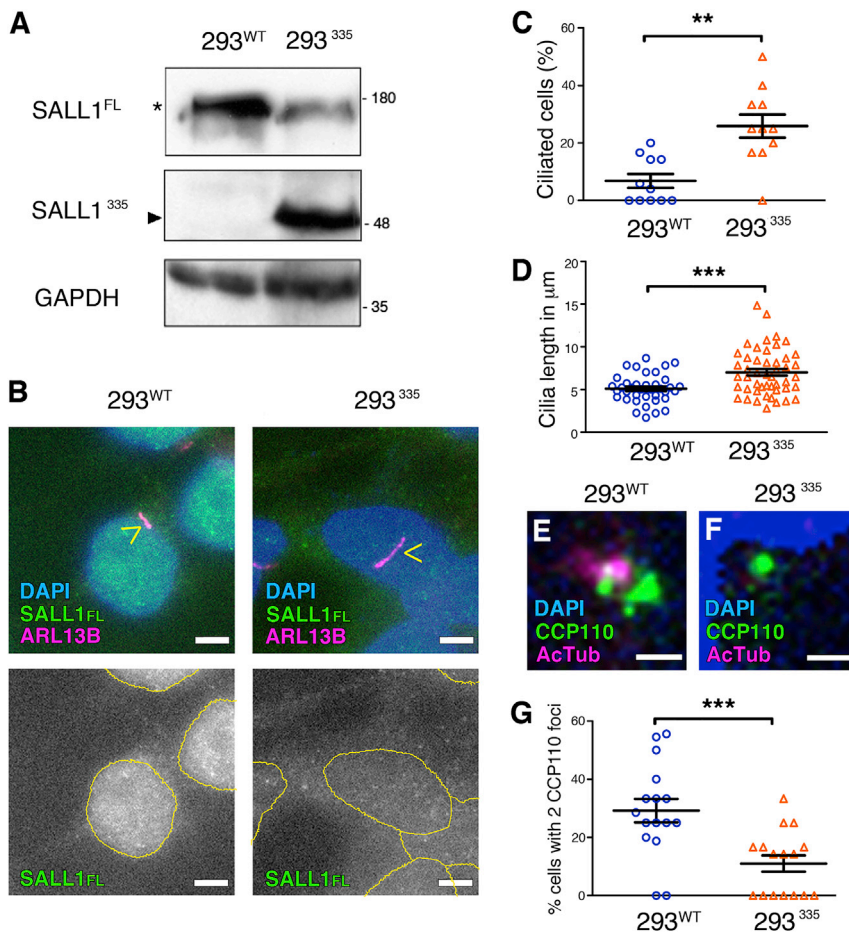

**Figure 6. Truncated SALL1 Leads to a TBS-like Cilia Phenotype in Genetically Modified Cells**

(A) Western blot analysis of lysates from WT HEK293FT cells (293<sup>WT</sup>) or CRISPR/Cas9 cells (293<sup>335</sup> cells). The latter were modified to mimic a TBS mutation in *SALL1* (*SALL1*<sup>c.1003dup</sup>). A truncated protein of about 48 kDa was identified in 293<sup>335</sup> cells by SALL1 antibody (SALL1<sup>p.Ser335Lysfs\*20</sup>, arrowhead). The asterisk indicates SALL1<sup>FL</sup>. GAPDH was used as a loading control. Molecular-weight markers are shown to the right.

(B) Micrographs of immunofluorescence using a specific antibody (green) show the subcellular distribution of SALL1<sup>FL</sup> in control or mutated cells. ARL13B marks the primary cilium (purple and yellow arrowheads), and DAPI marks the nuclei. Yellow circles indicate the nuclei, and black and white images show the single green channel. Scale bars, 5 μm.

(C and D) Graphical representation of cilia frequency (C) and cilia length measurements (D) of micrographs shown in (B) (cilia frequency: n = 11 micrographs; cilia length: n = 38 cilia in 293<sup>WT</sup> cells and n = 48 cilia in 293<sup>335</sup> cells). Three independent experiments were pooled together. The graphs represent the mean and SEM. The p values were calculated with a two-tailed unpaired Student's t test: \*\*p < 0.01, \*\*\*p < 0.001.

(E and F) Immunofluorescence micrographs of 293<sup>WT</sup> or 293<sup>335</sup> cells showing centrosomes (purple), CCP110 foci (green), and nuclei (DAPI in blue). Scale bars, 1 μm. Pictures were taken with a Zeiss Axioimager D1 fluorescence microscope with a 63× objective.

(G) Graphical representation of the percentage of cells showing CCP110 in two foci per micrograph in 293<sup>WT</sup> or 293<sup>335</sup> cells, corresponding to the experiments in (E) or (F), respectively.

mutations, especially those found in the hotspot that generate mislocalized truncated proteins,<sup>3</sup> might lead to aberrant cilia function. Three lines of evidence support our conclusions. First, TBS cells display significantly longer and more abundant cilia than control fibroblasts. Second, signaling through primary cilia is functionally defective in TBS<sup>p.Pro332Hisfs\*10</sup> fibroblasts and in *Shh-LIGHT2* cells that exogenously express the mutated form *SALL1*<sup>c.826C>T</sup>. Third, proteins necessary for the formation and function of primary cilia show altered dynamics in TBS<sup>p.Pro332Hisfs\*10</sup> fibroblasts, the 293<sup>335</sup> TBS model cell line, and *Sall1*<sup>+/-Δ</sup> MEFs.

#### Aberrant Interactions of Truncated SALL1

The presence of truncated SALL1 in the cytoplasm and its capacity to form inappropriate protein interactions could contribute to TBS. This hypothesis relies on the presence of the truncated form, which we were able to detect in TBS-derived dermal fibroblasts and in a genome-edited kidney-derived model cell line (293<sup>335</sup>).

In all these cases, the observed sizes of SALL1<sup>FL</sup> and its truncated forms were higher than their expected molecular weight, as shown by western blot. This has been previously observed<sup>12</sup> and might be consistent with differential SALL1 binding to SDS detergent or with the presence of excessive proline residues that might cause structural rigidity and thereby decrease electrophoretic mobility. Alternatively, posttranslational modifications could also account for variations in the expected molecular weight.

By examining dermal fibroblasts, which display primary cilia and are competent for SHH signaling, we have shown that truncated SALL1 has multiple effects on cilia formation and function. We conclude that this could be due to dominant-negative binding and displacement of cilia-related factors by the truncated forms of SALL1, alone or in complex with SALL1<sup>FL</sup>. Notwithstanding, some aspects of the disease might result from the sequestration of SALL1<sup>FL</sup> to the cytoplasm, which might interfere with the transcriptional role of SALL1 in



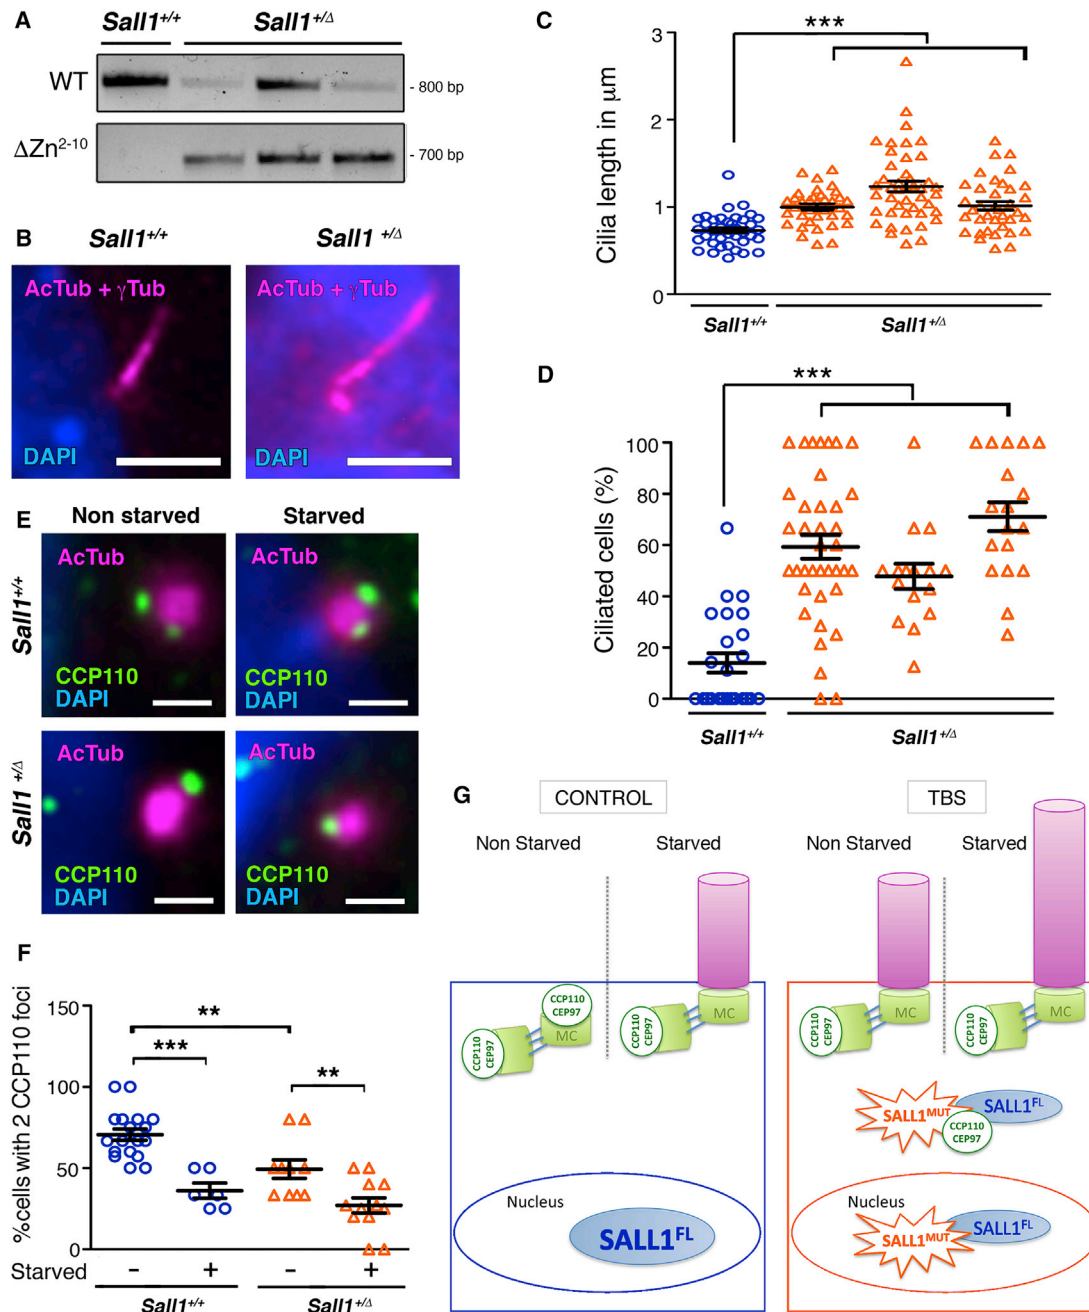

### Figure 7. Cells Derived from *Sall1*<sup>+/ $\Delta$</sup> Mouse Embryos Exhibit Cilia Defects

(A) PCR genotyping of MEFs derived from WT homozygous (*Sall1*<sup>+/+</sup>) or *Sall1*- $\Delta$ Zn<sup>2-10</sup> heterozygous (*Sall1*<sup>+/ $\Delta$</sup> ) embryos.

(B) Micrographs of *Sall1*<sup>+/+</sup> and *Sall1*<sup>+/ $\Delta$</sup>  MEFs analyzed during cilia assembly. Cilia were visualized by acetylated alpha-tubulin and gamma-tubulin (AcTub and  $\gamma$ Tub, respectively; purple), and nuclei were visualized by DAPI. Scale bar, 1  $\mu$ m.

(C and D) Graphical representation of cilia length (C) and cilia frequency (D) measured in *Sall1*<sup>+/+</sup> (n = 38 cilia and 24 micrographs for cilia length and frequency, respectively; blue circles) and *Sall1*<sup>+/ $\Delta$</sup>  MEFs in (B) (n = 37–45 cilia and n = 16–38 micrographs for cilia length and frequency, respectively; orange triangles).

(E) Immunofluorescence micrographs of *Sall1*<sup>+/+</sup> and *Sall1*<sup>+/ $\Delta$</sup>  MEFs showing the centrosomes (AcTub, purple), CCP110 foci (green), and nuclei (DAPI). Scale bars, 0.5  $\mu$ m. Cells that underwent 48 hr of starvation were compared with non-starved cells. Pictures were taken with a Deltavision fluorescence microscope (GE Healthcare Life Sciences) with a 60 $\times$  objective.

(F) Graphical representation of the percentage of cells showing CCP110 in two foci in *Sall1*<sup>+/+</sup> and *Sall1*<sup>+/ $\Delta$</sup>  MEFs in (E) (n > 10). The graphs represent the mean and SEM. p values were calculated by one-way ANOVA: \*\*p < 0.01, \*\*\*p < 0.001.

(G) The presence of a truncated SALL1 underlies cilia malformations in TBS. In control cells (left), SALL1<sup>FL</sup> is mainly nuclear, and CCP110 and CEP97 localize in the mother and daughter centrioles, inhibiting cilia formation. Upon starvation, CCP110 and CEP97 are depleted from the MC, which will allow the formation of the primary cilia. By contrast, in TBS cells (right) a truncated form of SALL1, together with sequestered SALL1<sup>FL</sup>, localizes in the cytoplasm, where it interacts with centrosomal proteins such as CCP110 and CEP97, displacing them from the MC. As a result, the frequency of cilia formation increases, and cilia are longer than in control cells. Problems in cilia assembly are accompanied by altered SHH signaling in TBS cells.

the nucleus, altering cilia through aberrant regulation of downstream genes. Other SALL proteins (SALL2, SALL3, and SALL4) might also heterodimerize with truncated SALL1<sup>11</sup> and thus contribute to the TBS etiology, as suggested by mouse studies that combine mutations in multiple *Sall* genes.<sup>44,45</sup> Interestingly, it has been reported that heterozygous deletions of *SALL1* (i.e., haploinsufficiency) lead to a milder form of TBS,<sup>46</sup> which might indicate that a certain dosage effect contributes to the TBS phenotype. How a reduction or loss of SALL1<sup>FL</sup> contributes to TBS etiology and cilia formation remains an intriguing subject for future research. *SALL1* is also a transcriptional target of the SHH pathway,<sup>45,47</sup> raising the possibility that *SALL1* is involved in feedback control, a common theme in SHH pathway regulation (e.g., *PTCH1* and *GLI1*).

### Primary Cilia Aberrations in TBS-Derived Cells

Compared with controls, TBS fibroblasts displayed longer, more frequent primary cilia, and those cilia took longer to be reabsorbed once serum was added to starved cells. Given that the dynamic balance between anterograde and retrograde transport determines cilia length,<sup>48</sup> truncated SALL1 could affect proper ciliary length by directly or indirectly impairing ciliary transport dynamics.<sup>49</sup> The presence of longer cilia in TBS-derived fibroblasts is consistent with other studies in which ciliary length was linked to phenotypes that overlap those observed in TBS individuals. For instance, cells derived from polydactylous *Kif7* mutant mice displayed elongated cilia.<sup>50–52</sup> Although not observed in all individuals, TBS can lead to polycystic kidneys. Consistently, kidney epithelial cells derived from a mouse model of nephrophtthisis exhibit abnormally longer cilia. This model develops polycystic kidney disease.<sup>53,54</sup> Notably, a recent study concluded that the reduction of ciliary length attenuated cystic disease progression in these mice,<sup>55</sup> suggesting that cilia-altering therapies could be beneficial to TBS individuals.

### SHH Signaling Aberrations and TBS

Because TBS-derived cells had longer and more abundant primary cilia, we did not expect to observe defects in SHH signaling given its dependence on intact cilia. TBS<sup>Pro332Hisfs\*10</sup>-derived cells were hypersensitive to stimulation of the SHH pathway. Increases in SHH activity or its expression domain in the developing limb bud can cause preaxial polydactyly (a phenotype commonly seen in TBS individuals) in mice, chicks, and humans.<sup>56–58</sup> SHH signaling defects might also underlie the pathogenesis of anorectal malformations in TBS individuals. For instance, it has been shown that *Gli2*<sup>-/-</sup> mice exhibit an imperforate anus, whereas *Gli3*<sup>-/-</sup> mice display less severe anal stenosis.<sup>59</sup> In humans, some individuals with Pallister-Hall syndrome (MIM: 146510), which is caused by mutations in *GLI3* (GLI-Kruppel family member 3 [MIM: 165240]), also exhibit anorectal malformations.<sup>60</sup>

Developmental pathways governing human outer-ear morphology are largely unexplored, but SHH signaling might be a contributing factor to TBS hearing problems given that SHH influences both proper cochlear and sensory epithelial development in mice and auditory function in humans.<sup>61</sup>

### CCP110 and CEP97, Candidate Mediators of TBS

#### Etiology

Our BioID experiments showed an enrichment of ciliary and/or centrosomal proteins among the potential interactors of truncated SALL1<sup>P.Arg276\*</sup>, which might underlie the observed ciliary defects. Among the SALL1<sup>P.Arg276\*</sup>-specific proximal interactors, approximately 6% of the proteins corresponded to verified ciliary genes previously identified by the SYSCILIA Consortium, and an additional 18% corresponded to their list of potential ciliary genes.<sup>62</sup> In addition, 6.5% of the SALL1<sup>P.Arg276\*</sup>-specific list was present among the 384 centrosome-localized proteins identified by the Human Protein Atlas project according to subcellular localization.<sup>63</sup> From among these candidates, we selected CCP110 and CEP97, which are important negative regulators of ciliogenesis.<sup>39,49,64,65</sup> The removal of these regulators is a key early event in ciliogenesis: depletion of CCP110 and CEP97 leads to the premature formation of aberrant cilia, whereas their overexpression blocks ciliogenesis, consistent with the increased frequency of primary cilia in TBS-derived cells. Although some studies demonstrated that removal of CCP110 was sufficient to induce ectopic cilia formation,<sup>39,41</sup> others reported that its depletion promoted abnormal elongation of non-docked centriolar microtubules.<sup>64,66</sup> A recent publication suggested that a context-dependent role of CCP110 in cilia formation is linked to its interactors in a particular subcellular environment.<sup>67</sup> Importantly, consistent with altered CCP110 localization at the MC in TBS<sup>Pro332Hisfs\*10</sup> cells, *CCP110*-KO mice exhibited preaxial polydactyly, heart malformations, and cleft palate among other problems. Understanding the exact contribution of CCP110 and its protein interaction network in the context of TBS, which could function in a tissue- or organ-dependent manner, would be of high relevance.

In conclusion, we propose that TBS is a potential ciliopathy-like disease with symptoms caused by truncated SALL1's interference with the normal function of cilia and/or centrosomal-related proteins (Figure 7G). The ciliopathies are an expanding class of human genetic disorders, and our work provides a framework for understanding TBS with a focus on primary cilia. This does not rule out a disruption in the nuclear role of SALL1 or dominant interactions with other proteins in the SALL family. Different alleles might exhibit different strengths depending on the interactors. Genetic, environmental, or stochastic modifiers also might influence the phenotypic spectrum in TBS individuals (see GeneReviews in the [Web Resources](#)).<sup>11</sup> Defining

the degree to which primary cilia and other factors are implicated in the etiology of TBS could drive future therapeutic approaches.

### Supplemental Data

Supplemental Data include five figures and one table and can be found with this article online at <https://doi.org/10.1016/j.ajhg.2017.12.017>.

### Acknowledgments

We are grateful to the tissue donors and their families for their generosity. We thank M. Vivanco (CIC bioGUNE) for donating control tissue and C. Johnson and A. Magee for providing reagents. R.B. thanks the Spanish MINECO (BFU2014-52282-P and BFU2017-84653-P), the Severo Ochoa Excellence Accreditation (SEV-2016-0644), and Consolider Programs (BFU2014-57703-REDC). Support was provided by the Department of Industry, Tourism, and Trade of the Government of the Autonomous Community of the Basque Country (Eortek Research Programs) and by the Innovation Technology Department of the Bizkaia County. L.B.-B. thanks the Basque Government Department of Education for the fellowship PRE\_2016\_2\_0226 and Boehringer Ingelheim for travel funding. J.A.R. is supported by funding from the Basque Government (IT634-13) and the University of the Basque Country UPV/EHU (UFI11/20). M.R. acknowledges support of the March of Dimes (6-FY13-127) and the National Institute of Diabetes and Digestive and Kidney Diseases (DK098563). We also thank the UPStream Consortium (ITN program PITN-GA-2011-290257, EU). Work at the Novo Nordisk Foundation Center for Protein Research is funded in part by a generous donation from the Novo Nordisk Foundation (NNF14CC0001).

Received: August 11, 2017

Accepted: December 19, 2017

Published: February 1, 2018

### Web Resources

CRISPOR, <http://crispor.tefor.net/>  
CRISPR Design, <http://crispr.mit.edu>  
g:Profiler, <http://www.biit.cs.ut.ee/gprofiler/>  
GeneReviews, Kohlhasse, J. (2007). Townes-Brocks Syndrome, <https://www.ncbi.nlm.nih.gov/books/NBK1445/>  
MaxQuant, <http://www.maxquant.org>  
Mutalyzer, <http://mutalyzer.nl/>  
OMIM, <http://www.omim.org/>

### References

1. Powell, C.M., and Michaelis, R.C. (1999). Townes-Brocks syndrome. *J. Med. Genet.* 36, 89–93.
2. Kohlhasse, J., Wischermann, A., Reichenbach, H., Froster, U., and Engel, W. (1998). Mutations in the SALL1 putative transcription factor gene cause Townes-Brocks syndrome. *Nat. Genet.* 18, 81–83.
3. Botzenhart, E.M., Bartalini, G., Blair, E., Brady, A.F., Elmslie, F., Chong, K.L., Christy, K., Torres-Martinez, W., Danesino, C., Deardorff, M.A., et al. (2007). Townes-Brocks syndrome: twenty novel SALL1 mutations in sporadic and familial cases and refinement of the SALL1 hot spot region. *Hum. Mutat.* 28, 204–205.
4. de Celis, J.F., and Barrio, R. (2009). Regulation and function of Spalt proteins during animal development. *Int. J. Dev. Biol.* 53, 1385–1398.
5. Netzer, C., Bohlander, S.K., Hinzke, M., Chen, Y., and Kohlhasse, J. (2006). Defining the heterochromatin localization and repression domains of SALL1. *Biochim. Biophys. Acta* 1762, 386–391.
6. Kiefer, S.M., McDill, B.W., Yang, J., and Rauchman, M. (2002). Murine Sall1 represses transcription by recruiting a histone deacetylase complex. *J. Biol. Chem.* 277, 14869–14876.
7. Sweetman, D., Smith, T., Farrell, E.R., Chantry, A., and Munsterberg, A. (2003). The conserved glutamine-rich region of chick csal1 and csal3 mediates protein interactions with other spalt family members. Implications for Townes-Brocks syndrome. *J. Biol. Chem.* 278, 6560–6566.
8. Furniss, D., Critchley, P., Giele, H., and Wilkie, A.O. (2007). Nonsense-mediated decay and the molecular pathogenesis of mutations in SALL1 and GLI3. *Am. J. Med. Genet. A.* 143A, 3150–3160.
9. Lauberth, S.M., Bilyeu, A.C., Firulli, B.A., Kroll, K.L., and Rauchman, M. (2007). A phosphomimetic mutation in the Sall1 repression motif disrupts recruitment of the nucleosome remodeling and deacetylase complex and repression of Gbx2. *J. Biol. Chem.* 282, 34858–34868.
10. Nishinakamura, R., Matsumoto, Y., Nakao, K., Nakamura, K., Sato, A., Copeland, N.G., Gilbert, D.J., Jenkins, N.A., Scully, S., Lacey, D.L., et al. (2001). Murine homolog of SALL1 is essential for ureteric bud invasion in kidney development. *Development* 128, 3105–3115.
11. Kiefer, S.M., Ohlemiller, K.K., Yang, J., McDill, B.W., Kohlhasse, J., and Rauchman, M. (2003). Expression of a truncated Sall1 transcriptional repressor is responsible for Townes-Brocks syndrome birth defects. *Hum. Mol. Genet.* 12, 2221–2227.
12. Kiefer, S.M., Robbins, L., Barina, A., Zhang, Z., and Rauchman, M. (2008). SALL1 truncated protein expression in Townes-Brocks syndrome leads to ectopic expression of downstream genes. *Hum. Mutat.* 29, 1133–1140.
13. Hildebrandt, F., Benzing, T., and Katsanis, N. (2011). Ciliopathies. *N. Engl. J. Med.* 364, 1533–1543.
14. Wheatley, D.N. (1995). Primary cilia in normal and pathological tissues. *Pathobiology* 63, 222–238.
15. Sorokin, S. (1962). Centrioles and the formation of rudimentary cilia by fibroblasts and smooth muscle cells. *J. Cell Biol.* 15, 363–377.
16. Gilula, N.B., and Satir, P. (1972). The ciliary necklace. A ciliary membrane specialization. *J. Cell Biol.* 53, 494–509.
17. Rezbakova, L., Kraatz, S.H., Akhmanova, A., Steinmetz, M.O., and Kammerer, R.A. (2016). Biophysical and Structural Characterization of the Centriolar Protein Cep104 Interaction Network. *J. Biol. Chem.* 291, 18496–18504.
18. Huangfu, D., Liu, A., Rakean, A.S., Murcia, N.S., Niswander, L., and Anderson, K.V. (2003). Hedgehog signalling in the mouse requires intraflagellar transport proteins. *Nature* 426, 83–87.
19. Yin, Y., Bangs, F., Paton, I.R., Prescott, A., James, J., Davey, M.G., Whitley, P., Genikhovich, G., Technau, U., Burt, D.W., and Tickle, C. (2009). The Talpid3 gene (KIAA0586) codes a centrosomal protein that is essential for primary cilia formation. *Development* 136, 655–664.

20. Behal, R.H., and Cole, D.G. (2013). Analysis of interactions between intraflagellar transport proteins. *Methods Enzymol.* *524*, 171–194.
21. Pigino, G., Geimer, S., Lanzavecchia, S., Paccagnini, E., Cantele, F., Diener, D.R., Rosenbaum, J.L., and Lupetti, P. (2009). Electron-tomographic analysis of intraflagellar transport particle trains in situ. *J. Cell Biol.* *187*, 135–148.
22. Corbit, K.C., Aanstad, P., Singla, V., Norman, A.R., Stainier, D.Y., and Reiter, J.F. (2005). Vertebrate Smoothed functions at the primary cilium. *Nature* *437*, 1018–1021.
23. Haycraft, C.J., Banizs, B., Aydin-Son, Y., Zhang, Q., Michaud, E.J., and Yoder, B.K. (2005). Gli2 and Gli3 localize to cilia and require the intraflagellar transport protein polaris for processing and function. *PLoS Genet.* *1*, e53.
24. May, S.R., Ashique, A.M., Karlen, M., Wang, B., Shen, Y., Zarbalis, K., Reiter, J., Ericson, J., and Peterson, A.S. (2005). Loss of the retrograde motor for IFT disrupts localization of Smo to cilia and prevents the expression of both activator and repressor functions of Gli. *Dev. Biol.* *287*, 378–389.
25. Taipale, J., Chen, J.K., Cooper, M.K., Wang, B., Mann, R.K., Milenkovic, L., Scott, M.P., and Beachy, P.A. (2000). Effects of oncogenic mutations in Smoothed and Patched can be reversed by cyclopamine. *Nature* *406*, 1005–1009.
26. Boldt, K., van Reeuwijk, J., Lu, Q., Koutroumpas, K., Nguyen, T.M., Texier, Y., van Beersum, S.E., Horn, N., Willer, J.R., Mans, D.A., et al.; UK10K Rare Diseases Group (2016). An organelle-specific protein landscape identifies novel diseases and molecular mechanisms. *Nat. Commun.* *7*, 11491.
27. González, M., Martín-Ruiz, I., Jiménez, S., Pirone, L., Barrio, R., and Sutherland, J.D. (2011). Generation of stable *Drosophila* cell lines using multicistronic vectors. *Sci. Rep.* *1*, 75.
28. Roux, K.J., Kim, D.I., Raida, M., and Burke, B. (2012). A promiscuous biotin ligase fusion protein identifies proximal and interacting proteins in mammalian cells. *J. Cell Biol.* *196*, 801–810.
29. Rubinson, D.A., Dillon, C.P., Kwiatkowski, A.V., Sievers, C., Yang, L., Kopinja, J., Rooney, D.L., Zhang, M., Ihrig, M.M., McManus, M.T., et al. (2003). A lentivirus-based system to functionally silence genes in primary mammalian cells, stem cells and transgenic mice by RNA interference. *Nat. Genet.* *33*, 401–406.
30. Reimand, J., Arak, T., Adler, P., Kolberg, L., Reisberg, S., Peterson, H., and Vilo, J. (2016). g:Profiler—a web server for functional interpretation of gene lists (2016 update). *Nucleic Acids Res.* *44* (W1), W83–W89.
31. Tanos, B.E., Yang, H.J., Soni, R., Wang, W.J., Macaluso, F.P., Asara, J.M., and Tsou, M.F. (2013). Centriole distal appendages promote membrane docking, leading to cilia initiation. *Genes Dev.* *27*, 163–168.
32. McCloy, R.A., Rogers, S., Caldon, C.E., Lorca, T., Castro, A., and Burgess, A. (2014). Partial inhibition of Cdk1 in G2 phase overrides the SAC and decouples mitotic events. *Cell Cycle* *13*, 1400–1412.
33. Wiederschain, D., Wee, S., Chen, L., Loo, A., Yang, G., Huang, A., Chen, Y., Caponigro, G., Yao, Y.M., Lengauer, C., et al. (2009). Single-vector inducible lentiviral RNAi system for oncology target validation. *Cell Cycle* *8*, 498–504.
34. Spalluto, C., Wilson, D.I., and Hearn, T. (2013). Evidence for repletion of RPE1 cells in late G1 phase, and ciliary localisation of cyclin B1. *FEBS Open Bio* *3*, 334–340.
35. Sato, A., Kishida, S., Tanaka, T., Kikuchi, A., Kodama, T., Asashima, M., and Nishinakamura, R. (2004). Sall1, a causative gene for Townes-Brocks syndrome, enhances the canonical Wnt signaling by localizing to heterochromatin. *Biochem. Biophys. Res. Commun.* *319*, 103–113.
36. Kim, D.I., Birendra, K.C., Zhu, W., Motamedchaboki, K., Doye, V., and Roux, K.J. (2014). Probing nuclear pore complex architecture with proximity-dependent biotinylation. *Proc. Natl. Acad. Sci. USA* *111*, E2453–E2461.
37. Van Itallie, C.M., Aponte, A., Tietgens, A.J., Gucek, M., Fredriksson, K., and Anderson, J.M. (2013). The N and C termini of ZO-1 are surrounded by distinct proteins and functional protein networks. *J. Biol. Chem.* *288*, 13775–13788.
38. Xue, Y., Wong, J., Moreno, G.T., Young, M.K., Côté, J., and Wang, W. (1998). NURD, a novel complex with both ATP-dependent chromatin-remodeling and histone deacetylase activities. *Mol. Cell* *2*, 851–861.
39. Spektor, A., Tsang, W.Y., Khoo, D., and Dynlacht, B.D. (2007). Cep97 and CP110 suppress a cilia assembly program. *Cell* *130*, 678–690.
40. Kleylein-Sohn, J., Westendorf, J., Le Clech, M., Habedanck, R., Stierhof, Y.D., and Nigg, E.A. (2007). Plk4-induced centriole biogenesis in human cells. *Dev. Cell* *13*, 190–202.
41. Tsang, W.Y., Bossard, C., Khanna, H., Peränen, J., Swaroop, A., Malhotra, V., and Dynlacht, B.D. (2008). CP110 suppresses primary cilia formation through its interaction with CEP290, a protein deficient in human ciliary disease. *Dev. Cell* *15*, 187–197.
42. Goetz, S.C., Liem, K.F., Jr., and Anderson, K.V. (2012). The spinocerebellar ataxia-associated gene Tau tubulin kinase 2 controls the initiation of ciliogenesis. *Cell* *151*, 847–858.
43. Prosser, S.L., and Morrison, C.G. (2015). Centrin2 regulates CP110 removal in primary cilium formation. *J. Cell Biol.* *208*, 693–701.
44. Böhm, J., Buck, A., Borozdin, W., Mannan, A.U., Matysiak-Scholze, U., Adham, I., Schulz-Schaeffer, W., Floss, T., Wurst, W., Kohlhase, J., and Barrionuevo, F. (2008). Sall1, sall2, and sall4 are required for neural tube closure in mice. *Am. J. Pathol.* *173*, 1455–1463.
45. Kawakami, Y., Uchiyama, Y., Rodriguez Esteban, C., Inenaga, T., Koyano-Nakagawa, N., Kawakami, H., Marti, M., Kmita, M., Monaghan-Nichols, P., Nishinakamura, R., and Izpisua Belmonte, J.C. (2009). Sall genes regulate region-specific morphogenesis in the mouse limb by modulating Hox activities. *Development* *136*, 585–594.
46. Borozdin, W., Steinmann, K., Albrecht, B., Bottani, A., Devriendt, K., Leipoldt, M., and Kohlhase, J. (2006). Detection of heterozygous SALL1 deletions by quantitative real time PCR proves the contribution of a SALL1 dosage effect in the pathogenesis of Townes-Brocks syndrome. *Hum. Mutat.* *27*, 211–212.
47. Koster, R., Stick, R., Loosli, F., and Wittbrodt, J. (1997). Medaka spalt acts as a target gene of hedgehog signaling. *Development* *124*, 3147–3156.
48. Avasthi, P., and Marshall, W.F. (2012). Stages of ciliogenesis and regulation of ciliary length. *Differentiation* *83*, S30–S42.
49. Goetz, S.C., and Anderson, K.V. (2010). The primary cilium: a signalling centre during vertebrate development. *Nat. Rev. Genet.* *11*, 331–344.
50. Liem, K.F., Jr., He, M., Ocbina, P.J., and Anderson, K.V. (2009). Mouse Kif7/Costal2 is a cilia-associated protein that regulates Sonic hedgehog signaling. *Proc. Natl. Acad. Sci. USA* *106*, 13377–13382.
51. He, M., Subramanian, R., Bangs, F., Omelchenko, T., Liem, K.F., Jr., Kapoor, T.M., and Anderson, K.V. (2014). The



- kinesin-4 protein Kif7 regulates mammalian Hedgehog signaling by organizing the cilium tip compartment. *Nat. Cell Biol.* *16*, 663–672.
52. Tunovic, S., Barañano, K.W., Barkovich, J.A., Strober, J.B., Jamal, L., and Slavotinek, A.M. (2015). Novel KIF7 missense substitutions in two patients presenting with multiple malformations and features of acrocallosal syndrome. *Am. J. Med. Genet. A.* *167A*, 2767–2776.
  53. Sahara, E., Luo, Y., Zhang, J., Manning, D.K., Beier, D.R., and Zhou, J. (2008). Nek8 regulates the expression and localization of polycystin-1 and polycystin-2. *J. Am. Soc. Nephrol.* *19*, 469–476.
  54. Smith, L.A., Bukanov, N.O., Husson, H., Russo, R.J., Barry, T.C., Taylor, A.L., Beier, D.R., and Ibraghimov-Beskrovnaya, O. (2006). Development of polycystic kidney disease in juvenile cystic kidney mice: insights into pathogenesis, ciliary abnormalities, and common features with human disease. *J. Am. Soc. Nephrol.* *17*, 2821–2831.
  55. Husson, H., Moreno, S., Smith, L.A., Smith, M.M., Russo, R.J., Pitstick, R., Sergeev, M., Ledbetter, S.R., Bukanov, N.O., Lane, M., et al. (2016). Reduction of ciliary length through pharmacologic or genetic inhibition of CDK5 attenuates polycystic kidney disease in a model of nephronophthisis. *Hum. Mol. Genet.* *25*, 2245–2255.
  56. Lettice, L.A., Heaney, S.J., Purdie, L.A., Li, L., de Beer, P., Oostra, B.A., Goode, D., Elgar, G., Hill, R.E., and de Graaff, E. (2003). A long-range Shh enhancer regulates expression in the developing limb and fin and is associated with preaxial polydactyly. *Hum. Mol. Genet.* *12*, 1725–1735.
  57. Masuya, H., Sagai, T., Wakana, S., Moriwaki, K., and Shiroishi, T. (1995). A duplicated zone of polarizing activity in polydactylous mouse mutants. *Genes Dev.* *9*, 1645–1653.
  58. Yang, Y., Drossopoulou, G., Chuang, P.T., Duprez, D., Marti, E., Bumcrot, D., Vargesson, N., Clarke, J., Niswander, L., McMahon, A., and Tickle, C. (1997). Relationship between dose, distance and time in Sonic Hedgehog-mediated regulation of anteroposterior polarity in the chick limb. *Development* *124*, 4393–4404.
  59. Mo, R., Kim, J.H., Zhang, J., Chiang, C., Hui, C.C., and Kim, P.C. (2001). Anorectal malformations caused by defects in sonic hedgehog signaling. *Am. J. Pathol.* *159*, 765–774.
  60. Kang, S., Graham, J.M., Jr., Olney, A.H., and Biesecker, L.G. (1997). GLI3 frameshift mutations cause autosomal dominant Pallister-Hall syndrome. *Nat. Genet.* *15*, 266–268.
  61. Driver, E.C., Pryor, S.P., Hill, P., Turner, J., Rütther, U., Biesecker, L.G., Griffith, A.J., and Kelley, M.W. (2008). Hedgehog signaling regulates sensory cell formation and auditory function in mice and humans. *J. Neurosci.* *28*, 7350–7358.
  62. van Dam, T.J., Whewey, G., Slaats, G.G., Huynen, M.A., Giles, R.H.; and SYSCILIA Study Group (2013). The SYSCILIA gold standard (SCGSv1) of known ciliary components and its applications within a systems biology consortium. *Cilia* *2*, 7.
  63. Uhlén, M., Fagerberg, L., Hallström, B.M., Lindskog, C., Oksvold, P., Mardinoglu, A., Sivertsson, Å., Kampf, C., Sjöstedt, E., Asplund, A., et al. (2015). Proteomics. Tissue-based map of the human proteome. *Science* *347*, 1260419.
  64. Schmidt, T.I., Kleylein-Sohn, J., Westendorf, J., Le Clech, M., Lavoie, S.B., Stierhof, Y.D., and Nigg, E.A. (2009). Control of centriole length by CPAP and CP110. *Curr. Biol.* *19*, 1005–1011.
  65. Kohlmaier, G., Loncarek, J., Meng, X., McEwen, B.F., Mogensen, M.M., Spektor, A., Dynlacht, B.D., Khodjakov, A., and Gönczy, P. (2009). Overly long centrioles and defective cell division upon excess of the SAS-4-related protein CPAP. *Curr. Biol.* *19*, 1012–1018.
  66. Franz, A., Roque, H., Saurya, S., Dobbelaere, J., and Raff, J.W. (2013). CP110 exhibits novel regulatory activities during centriole assembly in *Drosophila*. *J. Cell Biol.* *203*, 785–799.
  67. Yang, F., Yao, Y., Jiang, Y., Lu, L., Ma, Y., and Dai, W. (2016). Sumoylation is important for stability, subcellular localization, and transcriptional activity of SALL4, an essential stem cell transcription factor. *J. Biol. Chem.* *291*, 428.

**Supplemental Data**

**Truncated SALL1 Impedes Primary Cilia Function  
in Townes-Brocks Syndrome**

**Laura Bozal-Basterra, Itziar Martín-Ruíz, Lucia Pirone, Yinwen Liang, Jón Otti Sigurðsson, Maria Gonzalez-Santamarta, Immacolata Giordano, Estibaliz Gabicagogeascoa, Angela de Luca, Jose A. Rodríguez, Andrew O.M. Wilkie, Jürgen Kohlhase, Deborah Eastwood, Christopher Yale, Jesper V. Olsen, Michael Rauchman, Kathryn V. Anderson, James D. Sutherland, and Rosa Barrio**

**Figure S1**

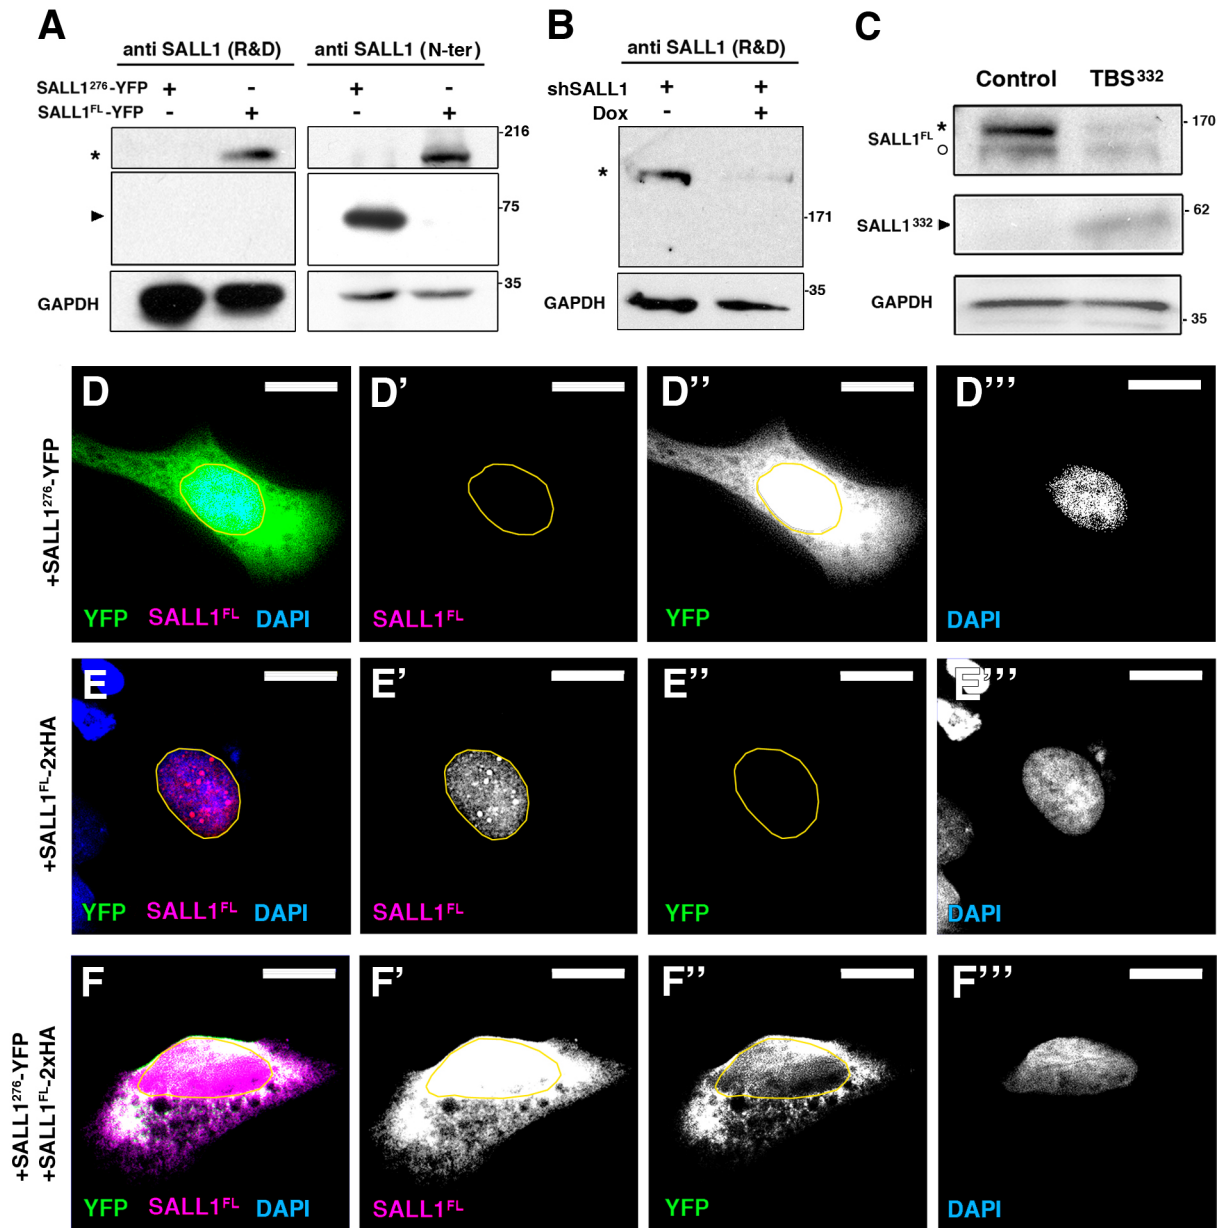

**Figure S1. Truncated SALL1 interacts with SALL1<sup>FL</sup> in the cytoplasm.** (A)

Western blot analysis of total lysates of HEK 293FT cells transfected with *SALL1<sup>c.826C>T</sup>(SALL1<sup>276</sup>)-YFP* or *SALL1<sup>FL</sup>-YFP*. Samples were run in duplicate on the same gel and probed against SALL1 using two different antibodies. Anti-SALL1 antibody from R&D specifically recognizes SALL1<sup>FL</sup> (asterisk), but not the truncated form (black arrowhead), while anti-SALL1 N-terminal specific detects both. Molecular

weights in kDa are shown to the right. **(B)** Western blot analysis of HEK 293FT lysates expressing SALL1 specific shRNA under the control of a doxycycline inducible promoter. Cells were subjected to doxycycline (+) or DMSO treatment (-) for 72h. SALL1<sup>FL</sup> protein was detected using anti-SALL1 antibody from R&D (asterisk) and GAPDH was used as a loading control. **(C)** Western blot analysis of human control or TBS<sup>332</sup> fibroblast lysates, showing reduction in the levels of the endogenous FL protein (asterisk, detected with R&D antibody) and expression of a truncated protein (black arrowhead, detected with N-terminal specific antibodies) in patients-derived cells. Empty circle indicates an unspecific band. Molecular weights in kDa are shown to the right. **(D-F)** Confocal micrographs of U2OS cells transfected with *SALL1*<sup>276</sup>-YFP **(D)**, *SALL1*<sup>FL</sup>-HA **(E)** or both **(F)**. SALL1<sup>FL</sup>-HA is in purple, SALL1<sup>276</sup>-YFP in green and nuclei in blue (DAPI). SALL1<sup>FL</sup> is recognized with FL specific antibodies (R&D) that do not recognize SALL1<sup>276</sup>, which localizes diffusely thorough nucleus and cytoplasm **(D)**. SALL1<sup>FL</sup> exhibits a nuclear pattern **(E)** that is impaired when SALL1<sup>276</sup> is present **(F)**. Black and white images show the single purple **(D'-F')**, green **(D''-F'')** and blue channels **(D'''-F''')**. Images were taken with a Zeiss Axioimager D1, 63x objective. Scale bar, 10  $\mu$ m.





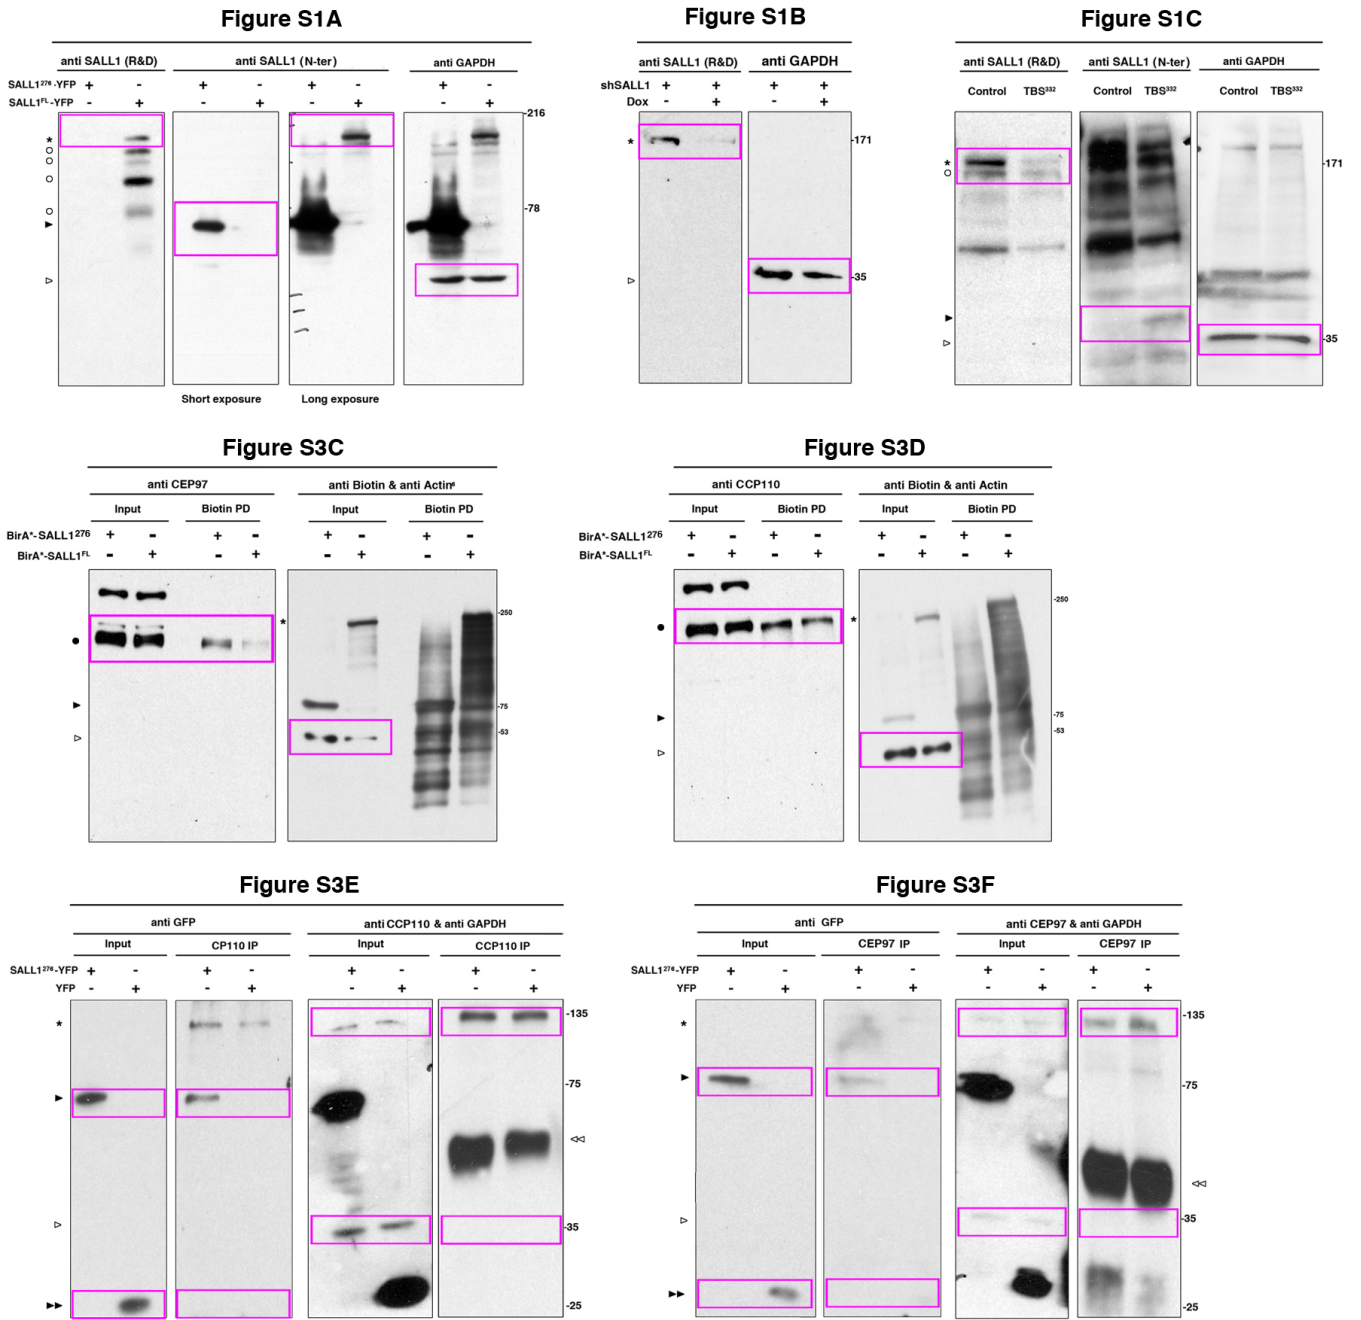

**Figure S2. Complete Western blot gel pictures.** Titles indicate the Figure where each Western blot belongs to; purple boxes show the region of the gel that was used to build their respective figures on each gel. SALL1<sup>FL</sup> protein is indicated by one asterisk, SALL1 truncated forms by one black arrowhead, CCP110 or CEP97 by a black circle, GAPDH, Vinculin or actin by an empty arrowhead and GFP or YFP by two black arrowheads. SALL1<sup>FL</sup> protein breakdowns or unspecific bands are indicated by empty circles.

Figure S3

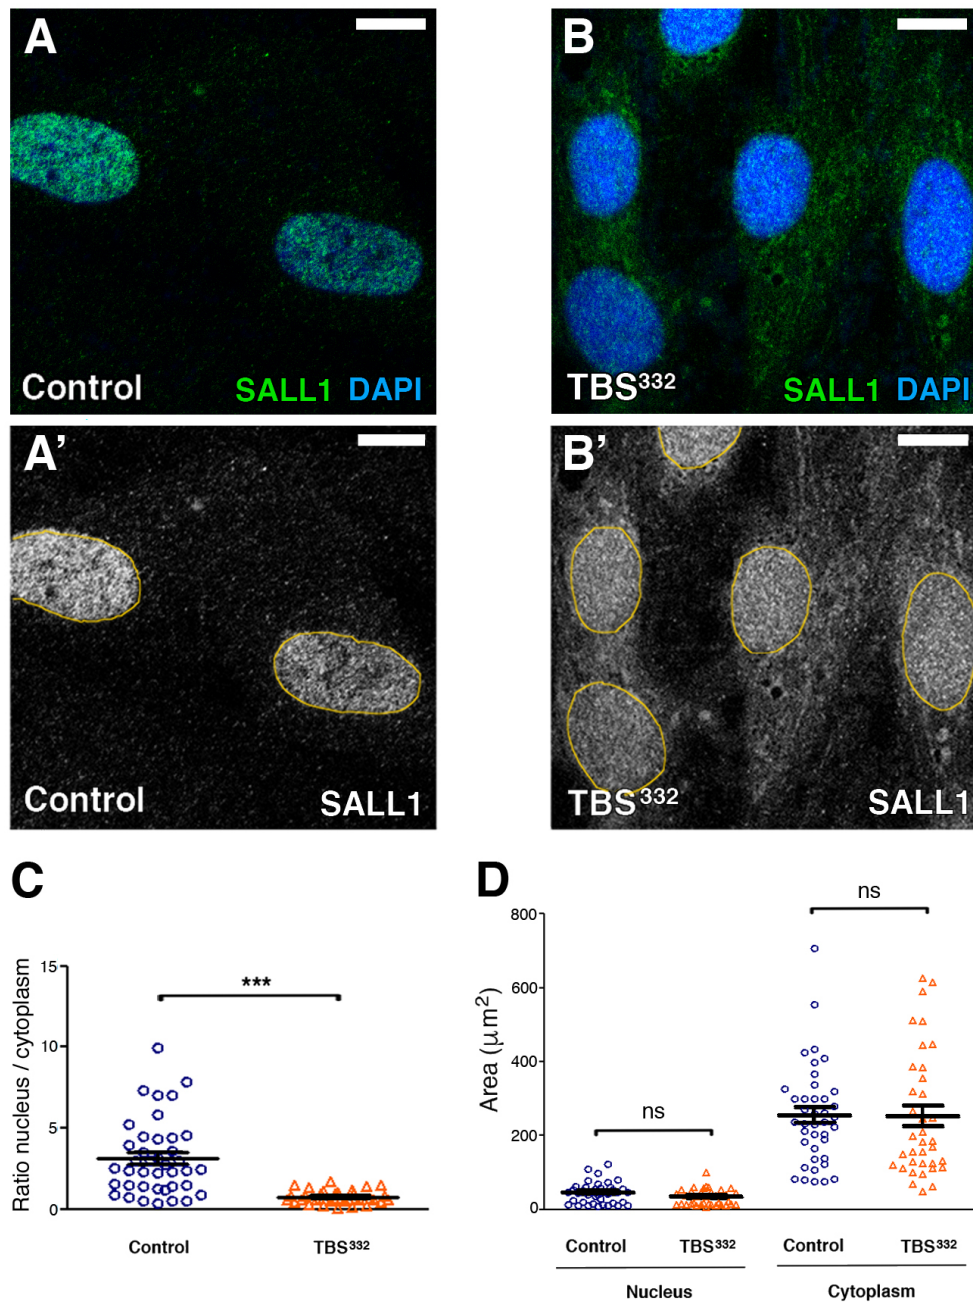

**Figure S3. Truncated SALL1 recruits SALL1<sup>FL</sup> to the cytoplasm.** (A,B) Confocal micrographs showing SALL1<sup>FL</sup> detected by FL specific antibodies (R&D) in control HFF (A) or TBS<sup>p.Pro332Hisfs\*10</sup> fibroblasts (TBS<sup>332</sup>) (B). Nuclei were labeled by DAPI (blue). Single green channel is shown as black and white images (A',B'). (C,D) Graphical representation of three independent experiments showing the ratio between the fluorescence quantification of the levels of SALL1<sup>FL</sup> in the nucleus or cytoplasm of

control HFF (n=40 cells; blue circles) or TBS<sup>332</sup>-derived fibroblasts (n=36 cells; orange triangles) (C) or the area in  $\mu\text{m}^2$  of control (n=33 cells, blue circles) or TBS<sup>332</sup> (n=33 cells, orange triangles) (D). The P-values were calculated with the Mann-Whitney two-tailed test. Median and interquartile range of the median are represented. All graphs represent the mean and SEM. (\*) P-value < 0.05, (\*\*\*) P-value < 0.0001. Scale bars, 10  $\mu\text{m}$ .

**Figure S4**

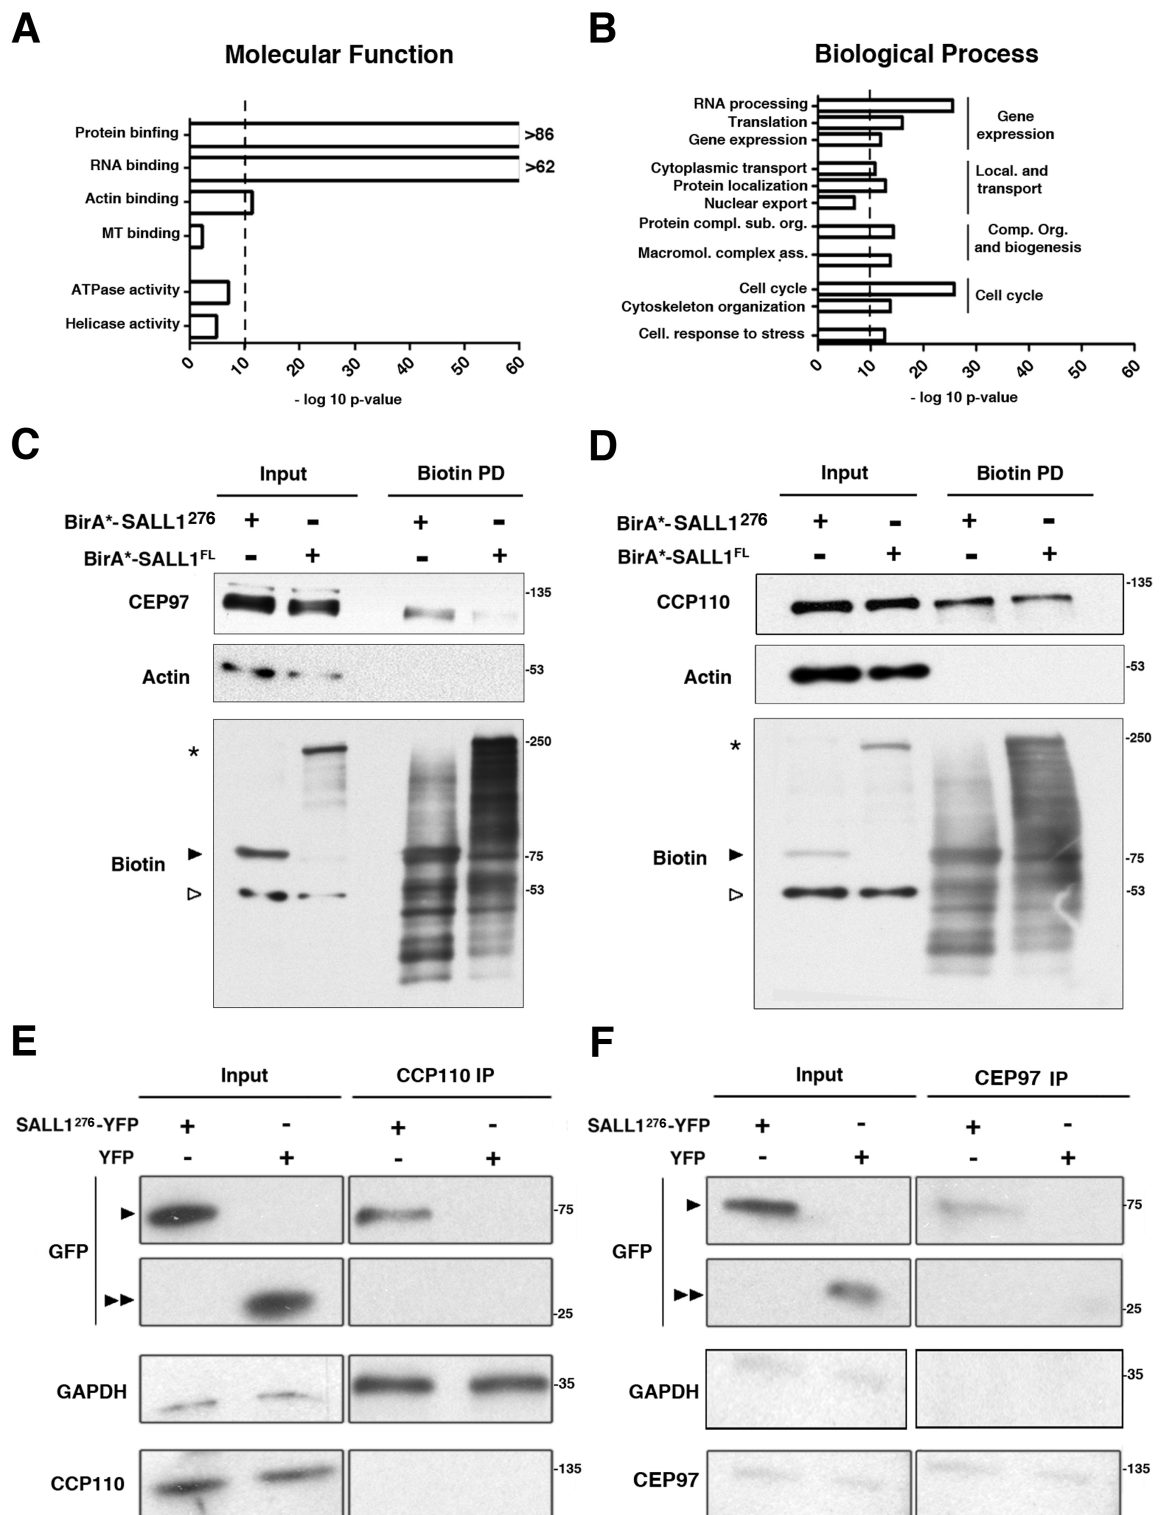

**Figure S4. Specific protein interactions by truncated or FL SALL1. (A,B)**

Graphical representation of the  $-\log_{10}$  of the P-value for each of the represented



Molecular Function (A) or Biological Process (B) GO terms in the BirA\*-SALL1<sup>p.Arg276\*</sup> proteome (SALL1<sup>276</sup>). Cell. response to stress, cellular response to stress; Comp. org. and biogenesis, component organization and biogenesis; Local. and transport, localization and transport; MT, microtubules; Macromol. complex as., macromolecular complex assembly; Protein compl. sub. org., protein complex subunit organization. (C,D) Western blot analysis of BioID, biotin pulldowns (PD) of HEK 293FT cells transfected with Myc-tagged *BirA*\*-*SALL1*<sup>FL</sup> or *BirA*\*-*SALL1*<sup>c.826C>T</sup> (*BirA*\*-SALL1<sup>276</sup>). Specific antibodies against the endogenous proteins CEP97 (C) or CCP110 (D) were used. Actin was used as loading control. Biotin antibody detected the most biotinylated proteins in the inputs and pulldowns, which are the self-biotinylated forms of *BirA*\*-SALL1<sup>FL</sup> (asterisks) and *BirA*\*-SALL1<sup>276</sup> (one black arrowhead), as well as other interactors in the pulldowns. White arrowheads indicate actin signal from previous probing. Blots shown are representative of three independent experiments. (E-F) Western blot of inputs and CCP110 or CEP97 IPs performed in HEK 293FT cells transfected with *SALL1*<sup>c.826C>T</sup>-*YFP* or *YFP* alone. Endogenous CCP110 and CEP97 in the IP interacted with conjugating G sepharose beads linked to specific antibodies. One black arrowhead marks SALL1<sup>276</sup>-YFP and two arrowheads YFP alone. GAPDH was used as loading control and CCP110 and CEP97 antibodies to control the IP. Molecular weight markers are shown to the right.

Figure S5

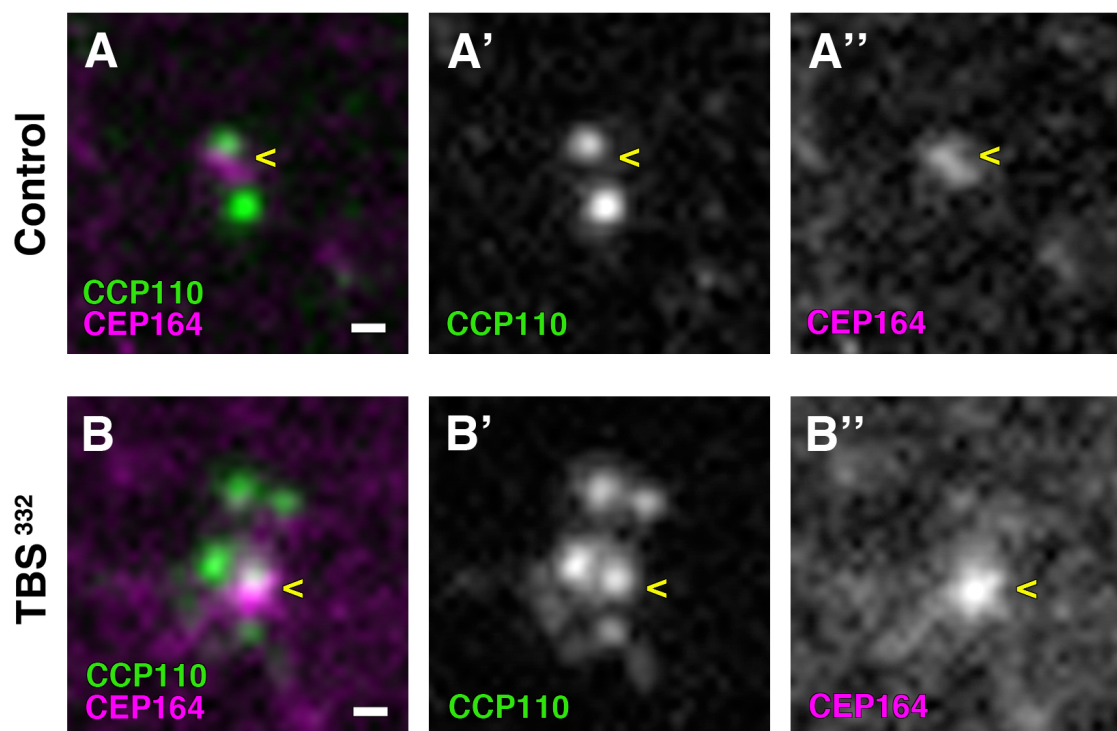

**Figure S5. CCP110 localizes aberrantly in multiple foci in TBS<sup>p.Pro332Hisfs\*10</sup> cells.**

Representative fluorescence micrograph of a control (A) and a TBS<sup>p.Pro332Hisfs\*10</sup> (TBS<sup>332</sup>) centrosome (B) showing CCP110 (green) in a cloudy pattern around the mother centriole (yellow arrow) marked by CEP164 (purple). Black and white images show the single green and purple channels. Pictures were taken using a Zeiss Axioimager D1, 63x objective. Scale bar, 1  $\mu$ m.
